1 **Extracellular vesicles from monocyte/platelet aggregates modulate human**  
2 **atherosclerotic plaque responses**

3

4 **Authors** Oggero S<sup>1</sup>, M.Sc., de Gaetano M<sup>2</sup>, Ph.D., Marcone S<sup>3</sup>, Ph.D., Barry M<sup>4</sup>,  
5 M.D., Montero-Melendez T<sup>1,5</sup>, Ph.D., Cooper D.<sup>1,5</sup>, Ph.D., Norling L V<sup>1,5</sup>, Ph.D.,  
6 Brennan E P<sup>2</sup>, Ph.D., Godson G<sup>2</sup>, Ph.D., Perretti M<sup>1,5</sup>, Ph.D.

7 **Institution:**

8 <sup>1</sup> William Harvey Research Institute, Barts and the London School of Medicine,  
9 Queen Mary University of London, London, United Kingdom.

10 <sup>2</sup> Diabetes Complications Research Centre, Conway Institute, & School of Medicine  
11 University College Dublin, Dublin, Ireland.

12 <sup>3</sup> Trinity Translational Medicine Institute, Trinity College Dublin, Dublin, Ireland.

13 <sup>4</sup> Department of Vascular Surgery, St. Vincent's University Hospital, Dublin, Ireland.

14 <sup>5</sup> Centre for inflammation and Therapeutic Innovation, Queen Mary University of  
15 London, London, United Kingdom.

16 **Running title:** Monocyte EVs in atherosclerosis.

17 **Correspondence to:**

18 Mauro Perretti, The William Harvey Research Institute, Barts and the London School  
19 of Medicine, Charterhouse Square, London, EC1M 6BQ, United Kingdom.

20 Tel: +44-2078828782; Fax:+44-2078826065; E-mail: m.perretti@qmul.ac.uk.

21

22 **Characters count:** 54784

23

24 **Subject codes:** Inflammation, Atherosclerosis, Coronary Artery Disease, Cell  
25 biology.

27 **Abstract**

28 In atherosclerosis, a chronic disease characterized by lipid accumulation, fibrosis  
29 and vascular inflammation, extracellular vesicles (EVs) are emerging as key players  
30 in different stages of disease development. Here we provide evidence that EVs  
31 released by mixed aggregates of monocytes and platelets in response to TNF- $\alpha$  are  
32 both CD14+ and CD41+. Tempering platelet activation with Iloprost™ impacted the  
33 quality and quantity of EV produced. Proteomics of EVs from cells activated with  
34 TNF- $\alpha$  alone or in presence Iloprost™ revealed distinct proteome, with selective hits  
35 like gelsolin. EVs from TNF- $\alpha$  stimulated monocytes augmented release of cytokines,  
36 and modulated more than 500 proteins by proteomics, when added to human  
37 atherosclerotic plaques. In contrast, EVs generated by TNF- $\alpha$  and Iloprost™  
38 produced minimal plaque activation. In conclusion, attenuating platelet activation has  
39 an effect on EV composition released from monocyte/platelet aggregates with  
40 downstream modulation of their pro-inflammatory actions and contribution to the  
41 development and progression of atherosclerosis.

42

43 **Keywords:** monocyte/platelet aggregates, vascular inflammation, proteomics.

44

45 **Abbreviations:** ELISA: enzyme linked immunoassay; EV: extracellular vesicle; FBS:  
46 foetal bovine serum; FMO: fluorescence minus one; LC-MS: liquid chromatography-  
47 mass spectrometry; PA: pathways analysis; PAF: Platelet Activator Factor; PBMCs:  
48 peripheral blood mononuclear cells; PBS: phosphate buffer saline; PRP: platelet rich  
49 plasma; T-PBS: PBS with 0.1% Triton; TNF- $\alpha$ : Tumour Necrosis Factor- $\alpha$ .

50

## 52 **Introduction**

53 Extracellular vesicles (EVs) are cell-borne particles that contain a complex biological  
54 cargo composed of nucleic acids, proteins and lipids. Firstly described by Wolf in  
55 1967, EVs were reported to have prothrombotic functions (1) and proposed to be a  
56 way for cells to dispose of unnecessary products (2). Since then, EVs have been  
57 ascribed extended properties impacting on both pathological and physiological  
58 processes, including modulation of adaptive immune response (3), tumour  
59 metastasis and growth (4), and coagulation cascade (5).

60

61 The majority of work conducted so far with EVs has focused on identifying the  
62 markers of cell of origin they bear; however, using neutrophil-derived EVs as  
63 prototypes, we proposed that their composition and hence properties would vary to  
64 reflect the environment surrounding the cell source (6). This study helped to develop  
65 the concept of EV heterogeneity (7): EVs mirror the activation state of their cell of  
66 origin through specific enrichment or presence of given proteins, lipids and nucleic  
67 acids, affecting in this manner their biological properties. For example, the  
68 procoagulant property of endothelial cell-derived EV is largely dependent on both the  
69 exposure of tissue factor and phosphatidylserine on the particle surface (8,9), while  
70 EV-mediated induction of endothelial cell proliferation is mainly tissue factor-  
71 dependent (10).

72

73 Atherosclerosis is the most prominent and common cause of cardiovascular  
74 diseases responsible for ~50% of all deaths in Europe (11). Complications of  
75 atherosclerosis, especially acute coronary syndromes, have been linked to rupture of  
76 vulnerable lesions, causing atherothrombosis and vessel occlusion. In the

Oggero et al., v1

77 pathogenesis of atherosclerosis, most of the cellular and molecular events including  
78 endothelial dysfunction, platelets activation and monocyte and macrophage  
79 accumulation, have been characterized (12), yet effective prevention of  
80 atherosclerosis and adverse cardiovascular events are still needed. Thus, studying  
81 the lesion biology is essential for growing our knowledge on the pathophysiology of  
82 atherosclerosis and to allow identification and development of novel therapeutic  
83 strategies. In this context, the possible implication of EVs in promoting and  
84 progressing this pathology is a recently explored field.

85

86 There is evidence for EVs to cause endothelial dysfunction, vascular calcification,  
87 unstable plaque progression, rupture and thrombus formation (13). Regarding  
88 plaque formation and destabilization, studies have focused on plaque-released EVs.  
89 For example, atherosclerotic plaque EVs expressed surface antigens of leukocyte  
90 origin (including major histocompatibility complex classes I and II), and promoted T-  
91 cell proliferation (14). In terms of EVs effects once added to the plaque, there is *in*  
92 *vivo* evidence for monocyte EVs to promote leucocyte adhesion to post-capillary  
93 venules and T-cell infiltration in atherosclerotic plaques (15). The majority of these  
94 studies have been conducted with murine models and *in vitro* cellular assays.  
95 However a better assessment of the inflammatory processes in human  
96 atherosclerosis can be attained through organ culture approaches, rather than using  
97 less complex experimental settings.

98

99 Here, we characterise human monocyte-derived EVs particularly in presence of  
100 platelets, to mimic a vascular inflammatory status, and define the composition of  
101 these EVs and their biological function once added to human atherosclerotic

Oggero et al., v1

102 plaques, observing a positive feed-forward mechanism fuelling inflammation and  
103 possibly instability. Intriguingly, attenuating platelet activation has an impact on EV  
104 composition and a functional effect on modulating the reactivity of the atherosclerotic  
105 plaque.

106

107

108 **Results.**

109 Monocyte-derived EVs are regulated by aggregation with platelets. After preparation  
110 of an enriched population of monocytes from human blood using negative selection  
111 procedure, flow cytometry analysis demonstrated a high degree of monocyte/platelet  
112 aggregates whereby  $56.5 \pm 5.1\%$  of CD14+ events were also positive for CD41+, the  
113 platelet marker (n=10; Fig. 1a and b). In order to determine whether platelet-  
114 monocyte interactions were dependent on platelets activation, we introduced Iloprost  
115 a potent analogue of prostacyclin in our isolation protocol. Addition of Iloprost during  
116 the isolation procedure did not impact on the formation of these aggregates (Fig. 1c),  
117 a phenomenon also visualised by ImageStream™ (Fig. 1f). A similar outcome was  
118 observed when cells were purified using the Histopaque low density gradient  
119 protocol (Fig. 1c).

120

121 A degree of monocyte and platelet activation consequent to the purification  
122 procedure was confirmed by transient cell surface expression of P-selectin and  
123 PSGL-1 compared when cells were purified using the Histopaque low density  
124 gradient protocol (Fig. 1d and e). EV-free monocyte supernatants were analysed to  
125 assess activation status, and an increase in all cytokine and chemokine levels were  
126 detected with TNF- $\alpha$  treatment with no significant modulation by the prostacyclin  
127 analogue (Fig S1).

128 **Figure 1. Iloprost controls platelet but not monocyte activation.** Whole blood (WB) or  
129 monocytes isolated using the RosetteSep purification protocol were incubated with or without 1  
130  $\mu\text{M}$  Iloprost ( $\text{PGI}_2$ ). CD14 and CD41 were used as markers for monocytes and platelets,  
131 respectively, for flow cytometry and Imagestream™ analyses. (a) Dotplot graph showing  
132 monocyte (CD14+) and platelet (CD41+) immunostaining to reveal presence of aggregates  
133 (double positive events). (b) Percentages of CD14+ (monocytes), CD41+ (platelets),  
134 CD14+/CD41+ double positive (aggregates) events. Data are mean  $\pm$  SEM of n=10 distinct cell  
135 preparations. Representative of n=10 distinct cell preparations. (c) Proportion of aggregates as  
136 analysed by Imagestream™ comparing Whole blood (WB) cells with purified monocytes in the  
137 presence or absence of Iloprost (\*p<0.05, \*\*p<0.01, \*\*\*p< 0.001; one-way ANOVA post  
138 Bonferroni test, mean  $\pm$  SEM, n=5 distinct preparations). (d) P-selectin expression of

Oggero et al., v1

139 monocyte/platelets aggregates following presence or absence of Iloprost compared to WB  
140 cells. Data are mean  $\pm$  SEM of n=4 distinct cell preparations. (e) PSLG-1 expression of  
141 monocyte/platelet aggregates upon addition or not of Iloprost following presence or absence of  
142 Iloprost compared to WB cells. Data are mean  $\pm$  SEM of n=4 distinct cell preparations. (f)  
143 Visualization of monocyte/platelet aggregates as identified by ImageStream™. Representative  
144 of n=5 distinct cell preparations.  
145

146 These data indicate that monocyte isolation leads to immune cells carrying platelets  
147 and that Iloprost addition does not affect the extent of this interaction. Since  
148 monocyte/platelet aggregates are typical of several cardiovascular settings, including  
149 atherosclerosis (see Discussion), we decided to exploit this enriched monocyte  
150 preparation herein obtained to study formation and properties of EVs generated in  
151 these cell-to-cell crosstalk settings.  
152

153 For deep analysis of EVs, we implemented a validated protocol where fluorescence  
154 triggering of EVs (labelled with BODIPY-FITC) allows a better identification by  
155 ImageStream™ (Headland et al. 2015). Using a double gating strategy for staining  
156 with CD14+ and CD41+, EVs from platelets (CD41+/CD14-; ~15%), monocytes  
157 (CD41-/CD14+; ~60%) and a subset bearing both markers (CD41+/CD14+; ~7.5%)  
158 were identified, both in presence and absence of TNF- $\alpha$  and Iloprost (Fig. 2a). TNF- $\alpha$   
159 addition to monocytes almost doubled the number of total EVs compared with  
160 unstimulated cells (n=5, P<0.01) (Fig. 2b). Addition of Iloprost did not affect basal EV  
161 numbers (Fig. 2b). Similar results were obtained for total CD14+ EV, however  
162 addition of Iloprost significantly reduced (~40%) the proportion and number of both  
163 CD41+/CD14- and CD14+/CD41+ EVs as quantified in response to TNF- $\alpha$   
164 stimulation (Fig. 2c-e). When the cellular preparations were stimulated with PAF, a  
165 known activator of platelets as well as of monocytes, a larger number of EVs were  
166 produced with a higher proportion of CD14+/CD41+ events (1/5 of total CD14+  
167 events); this time Iloprost afforded a marked reduction of all EV subset values (Fig.

168 S2). Thus while Iloprost did not affect formation of monocyte/platelet aggregates and  
169 exerted selective inhibition on TNF- $\alpha$  stimulated EV numbers and phenotypes, it  
170 markedly affected PAF stimulation indicating high efficacy in reducing platelet and  
171 monocyte activation, regulating mainly the release of platelet EVs (CD41+) and  
172 CD14+/CD41+ double positive EVs.

173 **Figure 2. Characterization of monocyte/platelet derived EVs.** Monocytes were isolated  
174 using the RosetteSep purification protocol. Cells ( $1 \times 10^6$ /ml) were incubated with vehicle (V) or  
175 TNF- $\alpha$  (50 ng/ml), in presence or absence of Iloprost (1  $\mu$ M; PGI<sub>2</sub>) for 60 min. (a)  
176 ImageStream™ analysis of the vesicle showing quadrant selections, FMOs and representative  
177 images following staining for anti-CD14 or anti-CD41. EV generation in cell-free supernatants  
178 was quantified following Bodipy staining for total vesicles (b); monocyte CD14+ EVs (c); platelet  
179 CD41+ EVs (d) and double positive CD14+/CD41+ vesicles (e). (\* $p < 0.05$ , \*\* $p < 0.01$ , \*\*\* $p <$   
180  $0.001$ ; one-way ANOVA post Bonferroni test, mean  $\pm$  SEM,  $n = 5$  distinct preparations). (f)  
181 Visualization of CD14+ (top panel), CD41+ (middle panel) and CD14/CD41 double positive  
182 (bottom panel) EVs by ImageStream™.  
183

184 The physical characteristics of EVs were studied by nanoparticle tracking analysis.  
185 This set of experiments demonstrated that vesicles produced in these settings  
186 ranged between 50 and 500 nm in diameter (Fig. S3); addition of Iloprost had  
187 modest or nihil effect on the physical characteristics of the EV samples. All  
188 preparations of EVs displayed similar size mean and mode regardless of the  
189 stimulating agent applied or presence of Iloprost (Fig. S3).

190

191 EVs differentially activate HUVEC. Since EVs from different cellular sources can  
192 activate endothelial cells (17,18), a major cellular player in blood vessel  
193 angiogenesis and plaque formation (19,20), we queried whether EVs derived from  
194 monocyte/platelet aggregates could impact on HUVEC reactivity. An overnight  
195 protocol was applied, testing initially a concentration-range of 1 to 20 EVs per  
196 endothelial cell. These experiments combined with published data (17,21) indicated  
197 that a ratio of 10 EVs/Cell was optimal for our experimental approach. Indeed,  
198 microscopy imaging showed changes in HUVEC morphology after incubation with



Oggero et al., v1

199 EVs isolated from monocyte stimulated with TNF- $\alpha$  (Fig. 3a). Furthermore cells  
200 showed a significant uptake of these EVs after 24 hour incubation (Fig. 3b). Next we  
201 quantified markers of cell activation.

202

203 Flow Cytometry analysis revealed that expression of ICAM-1 and VCAM-1 was  
204 significantly upregulated when cells were treated with 10 ng/mL of TNF- $\alpha$  as positive  
205 control. Furthermore, similar increases were recorded when HUVEC were stimulated  
206 with EVs isolated from monocytes enriched preparations incubated with TNF- $\alpha$ . Of  
207 interest, ICAM-1 levels were no modified at all following incubation with EVs isolated  
208 from Iloprost and TNF- $\alpha$  stimulated monocytes (Fig. 3c). When similar experiments  
209 were repeated with the same concentrations ( $10 \times 10^6$ ) of platelet EVs, isolated from  
210 cells in both stimulated (TNF- $\alpha$ ) or in resting conditions, expression of either ICAM-1  
211 or VCAM-1 was not modified, suggesting a synergistic role of monocyte/platelet  
212 aggregates in releasing functional EVs upon TNF- $\alpha$  stimulation (Fig. S4). Of  
213 relevance, only negligible amounts of residual TNF- $\alpha$  were detected in any of the  
214 vesicle preparations used (Fig. S5).

215

216 Cytokine measurements of HUVEC supernatants was then conducted. Cell  
217 incubation with EVs released by monocytes stimulated with TNF- $\alpha$  augmented  
218 concentrations of GM-CSF, IL-6 and IL-8 to a significant degree (Fig. 3d-f). When  
219 EVs were produced in presence of Iloprost, a lower regulation of these three  
220 cytokines was quantified (Fig. 3-f). These data together suggested a different pro-  
221 inflammatory effect of EVs generated from enriched monocyte preparations in  
222 response to several conditions chosen to mimic vascular inflammation.

223 **Figure 3. Monocyte/platelet EVs activate HUVEC *in vitro*.** Monocyte were obtained as in  
224 Figure 2 and incubated with vehicle (V) or TNF- $\alpha$  (50 ng/ml), in presence or absence of

Oggero et al., v1

225 Iloprost (1  $\mu$ M; PGI<sub>2</sub>) for 60 min. HUVEC were incubated with the reported EVs (10x10<sup>6</sup>/ml)  
226 overnight. Cells were stained for flow cytometry analysis and supernatants were  
227 collected and analysed for cytokine release. (a) Representative microscopic image of  
228 HUVEC after treatment monocyte EVs from vehicle-incubated monocyte or TNF- $\alpha$   
229 stimulated cells. (b) Confocal images of the uptake by HUVEC stained with Phalloidin (red)  
230 after 24 hours of BODIPY labelled EV isolated from TNF- $\alpha$  stimulated cells (green/white  
231 arrows). (c) Quantification of ICAM-1 and VCAM-1 expression (MFI units) in HUVEC treated  
232 with different subsets of monocyte derived EVs. (d) Quantification of GMCSF, IL-6 and IL-8  
233 levels by ELISA. (\*p<0.05, \*\*p<0.01, \*\*\*p< 0.001; one-way ANOVA post Bonferroni test,  
234 mean  $\pm$  SEM of n=5 cell preparation incubated with distinct EV preparations from different  
235 donor cells).

236

237 EV triggers differential activation of human atherosclerotic plaque. Having confirmed  
238 that EVs derived from monocyte/platelet aggregates can activate endothelial cells,  
239 we tested if they might be a functional determinant in atherosclerosis. Thus, we  
240 assessed their function on an atherosclerotic plaque using an *ex-vivo* organ culture  
241 protocol (Fig. 4a-b). Herein we compared an overnight incubation with EVs  
242 generated from different cellular activation protocols, using the same concentration  
243 of EVs, as described in the previous section, to resemble vascular inflammation.  
244 Then, we quantified cytokines and proteins released in the supernatants from the  
245 plaque fragments.

246

247 Cytokine multiplex analyses revealed that treatment of the plaque with EVs released  
248 by monocytes stimulated with TNF- $\alpha$ , augmented concentrations of TNF- $\alpha$ , IL-6, IL-  
249 13, IFN- $\gamma$  and GM-CSF in the culture media (Fig. 4c and Supplementary Table S2).  
250 As mentioned already above only negligible amounts of residual TNF- $\alpha$  were  
251 detected in any of the vesicle preparations used (Fig. S5). When EVs were  
252 generated in the presence of Iloprost, a much milder regulation of the general  
253 cytokine response was noted (Fig. 4c). These findings seemed to confirm the  
254 acquisition of a pro-inflammatory phenotype of EVs not only *in vitro* but also *ex vivo*  
255 when monocytes enriched preparation were stimulated with TNF- $\alpha$ . Such an effect

Oggero et al., v1

256 was markedly attenuated when EVs were generated by Iloprost+TNF- $\alpha$  treatment, a  
257 finding corroborated by further quantification of IL-6 and IL-13 in the supernatants.  
258 (Fig. 4d,e). Of importance, the use of 0.1% FBS to enable plaques fragments viability  
259 did not affect the experimental outcome.

260 **Figure 4. Monocyte/platelet EVs activate human atherosclerotic plaque ex-vivo.**  
261 Monocyte were obtained as in Figure 2 and incubated with vehicle (V) or TNF- $\alpha$  (50 ng/ml),  
262 in presence or absence of Iloprost (1  $\mu$ M; PGI<sub>2</sub>) for 60 min. Human atherosclerotic plaque  
263 fragments were incubated with the reported EVs (10x10<sup>6</sup>/ml) overnight. Supernatants were  
264 collected and used for ELISA analysis. (a,b) Representative images of human femoral  
265 plaque and fragment incubation. (c) Heat map analysis showing qualitative modulation of  
266 cytokine release (linear scale bar). (d,e) Quantification of IL-6 and IL-13 levels by ELISA.  
267 (\*p<0.05, \*\*p<0.01, \*\*\*p< 0.001; one-way ANOVA post Bonferroni test, mean  $\pm$  SEM of n=5  
268 plaques incubated with distinct EV preparations from different donor cells).  
269

270 To acquire a view of the broader effects of these EVs on plaque reactivity, tissue  
271 conditioned media were analysed by proteomics. In total, 654 proteins were  
272 identified in human plaque supernatants as reported in Table S3. Subsequently, we  
273 performed statistical analysis in order to determine proteins differentially secreted  
274 between plaques treated with different EVs subsets as compared to the untreated  
275 plaque. In total, 52 proteins resulted significantly modulated with the majority of  
276 these proteins (13) being uniquely modulated when the plaque was treated with  
277 TNF- $\alpha$ -stimulated monocyte/platelet aggregates EVs. Treatment of plaque with EVs  
278 from unstimulated cells (vehicle) produced a limited response with 6 significant  
279 proteins being modulated. Both EVs from Iloprost (PGI<sub>2</sub>) and Iloprost+TNF- $\alpha$   
280 monocytes resulted in the modulation of the release of a different set of 8 unique  
281 proteins (Fig. 5a). Only 3 proteins were common between all the groups (Fig. 5a):  
282 guanine nucleotide-binding protein subunit beta-2-like 1 (GNBL1; a regulator of  
283 several signalling pathways), Serpin B6 (SERPINB6; natural inhibitor of serine  
284 proteinases) and Voltage-dependent anion-selective channel protein 1 (VDAC1; a  
285 protein that forms a channel through plasma membrane). Details of the proteins

Oggero et al., v1

286 identified in this analysis are reported in Table S4. As shown in Figure 5a, functional  
287 enrichment analysis of the modulated proteins mapped to distinct cellular functions  
288 including immune system, neutrophil degranulation and extracellular matrix  
289 organization. Of interest, plaque fragments treatment with EVs isolated from TNF- $\alpha$   
290 stimulated monocytes not only increased the overall number of modulated proteins  
291 but a higher number of proteins involved in these functions emerged as well.

292

293 Prompted by the distinct phenotypic response of the plaque to different EVs subsets,  
294 we performed a targeted analysis directly comparing plaque treated with TNF- $\alpha$  EVs  
295 and Iloprost+TNF- $\alpha$  EVs: this analysis revealed a set of 15 modulated proteins as  
296 reported in Figure 5b. Of these, nine proteins were downregulated while six proteins  
297 were upregulated (Fig. 5b).STRING network analysis showed an enrichment in 6  
298 proteins involved in extracellular matrix reorganization (Fig. 5c), a process which is  
299 crucial in vascular remodelling and atherosclerotic plaque formation. Fibulin (FBLN2)  
300 was consistently upregulated from plaques treated with TNF- $\alpha$  EVs but not with  
301 Iloprost+TNF- $\alpha$  EVs. This protein is emerging as a major effector in cardiac fibrosis  
302 and tissue remodelling (see Discussion) suggesting it may play a pivotal role in  
303 plaque activation and likely destabilization following incubation with TNF- $\alpha$  EVs.  
304 Conversely, Gelsolin (GSN) is a protein involved in actin filament assembly and  
305 organization (22), hence described to maintain the cytoskeleton structure in arteries  
306 (see Discussion), showed an opposite modulation.

307 **Figure 5. Modulation of secreted proteins from human atherosclerotic plaques by**  
308 **monocyte/platelet EVs.** Monocyte were obtained as in Figure 2 and incubated with vehicle  
309 (V) or TNF- $\alpha$  (50 ng/ml), in presence or absence of Iloprost (1  $\mu$ M; PGI<sub>2</sub>) for 60 min. Human  
310 atherosclerotic plaque fragments were incubated with the indicated EV subsets (10x10<sup>6</sup>/ml)  
311 overnight and proteomic conducted on supernatants. (a) Venn Diagram and related  
312 reactome pathway enrichment analysis obtained by PANTHER software clustering the  
313 significantly modulated proteins (p<0.05) by the EV treatments as indicated. (b) Hierarchical  
314 clustering heatmap identifying the 15 secreted proteins that were significantly modulated  
315 when comparing TNF- $\alpha$  EVs versus TNF- $\alpha$ +PGI<sub>2</sub> EVs (p<0.05). Red represents up-regulated

Oggero et al., v1

316 proteins while blue depicts down-regulated proteins. (c) Protein-Protein interaction network  
317 of the 15 proteins obtained by STRING: network nodes represent proteins; network edges  
318 indicate the strength of data support; proteins associated with “extracellular matrix  
319 organization” pathway are highlighted in red.

320

321 Characterization of monocyte EV subsets revealed differential protein expression

322 associated with regulation of vascular inflammation and plaque formation. The

323 experimental data presented so far are indicative of different pharmacodynamics

324 properties produced by EVs obtained with TNF- $\alpha$ -treated monocytes compared to

325 vesicles generated following treatment with Iloprost+TNF- $\alpha$ . In order to verify if these

326 effects were mediated by a differential EVs composition we performed a proteomic

327 characterization of TNF- $\alpha$  and Iloprost+TNF- $\alpha$  EVs. We identified 681 proteins in

328 EVs by LS-MS/MS (Table S5), of which 32 proteins were significantly altered

329 ( $p < 0.05$ ) when comparing TNF- $\alpha$  EVs to Iloprost+TNF- $\alpha$  EVs. (Fig. 6a): of these, 19

330 proteins were upregulated and 13 downregulated following cell incubation with

331 Iloprost (Fig. 6b). Moreover, proteins uniquely expressed were also identified: 10

332 proteins for TNF- $\alpha$  EVs and only two for Iloprost+TNF- $\alpha$  EVs (Fig. 6a). Of interest,

333 we detected Annexin A1, which is a faithful marker for membrane-spawn vesicles

334 (23). Gelsolin (GSN) was identified as an interesting protein which was augmented in

335 Iloprost+TNF- $\alpha$  EVs; this protein was also identified in the plaque proteomic analysis

336 (see previous section). However, Fibulin was not a hit identified by this analysis

337 (Table S5), while being regulated in the plaque proteome as discussed above. Next,

338 and to further validate these data, we confirmed the relative abundance of a selected

339 group of proteins by Western blotting and Imaging flow cytometry.

340

341 To this end, equal numbers of monocyte/platelet EVs of each subset were loaded

342 and immunostained for GSN, ANXA1, HSPB1 employing ATCB as a loading control.

343 The blots confirmed that GSN was enriched in Iloprost+TNF- $\alpha$  EVs (Fig. 6c),  
344 whereas HSPB1 and ANXA1 were mildly regulated across the two EV subsets (Fig.  
345 6d), again confirming the proteomics results. ImageStream analyses revealed that  
346 GSN and ANXA1 were also detected of the surface of the EVs (Fig. 6e), establishing  
347 again the selective enrichment of GNS in EVs isolated from monocytes stimulated  
348 with Iloprost and TNF- $\alpha$  (Fig. 6f), but not major changes for ANXA1. When CD41+  
349 EVs were analysed, GSN+ EVs were  $46.1 \pm 1.94\%$  in TNF- $\alpha$  EVs and  $63.4 \pm 2.15\%$  in  
350 the Iloprost+TNF- $\alpha$  EV group (mean  $\pm$  SEM, n=3 distinct preparations).

351 **Figure 6. Proteomic analysis of monocyte/platelet EVs.** Monocyte were obtained as in  
352 Figure 2 and incubated with TNF- $\alpha$  (50 ng/ml), in presence or absence of Iloprost (1  $\mu$ M;  
353 PGI<sub>2</sub>) for 60 min, prior to EV purification. Targeted analysis highlighting differences between  
354 TNF- $\alpha$  and TNF- $\alpha$ +PGI<sub>2</sub> EVs identified 33 proteins that were significantly altered (Table S5).  
355 (a) Venn diagram showing the proteins that are differentially expressed between TNF- $\alpha$   
356 versus PGI<sub>2</sub>+TNF- $\alpha$  EVs. In the intersection of the diagram are reported the proteins there  
357 are significantly altered between the two EVs populations ( $p < 0.05$ , red represents up-  
358 regulated proteins while blue depicts down-regulated proteins in TNF- $\alpha$ + PGI<sub>2</sub> EVs). In  
359 black, we identify proteins that are uniquely expressed in either EVs population. (b)  
360 Hierarchical clustering heatmap of differentially expressed proteins (centre of Venn diagram  
361 in panel a) between TNF- $\alpha$  versus PGI<sub>2</sub>+TNF $\alpha$  EVs ( $p < 0.05$ ). (c) Western blot analyses of  
362 distinct EV preparations used to detect immunoreactivity for Gelsolin (GSN), Annexin A1  
363 (AnxA1), heat shock protein  $\beta$ 1 (HSPB1) and  $\beta$ -actin (ACTB1). Three distinct EV  
364 preparations were tested. (d) Densitometry analysis, ACTB1 was used as loading control. (e)  
365 ImageStream™ analysis of a select group of proteins identified in the proteomic screen (see  
366 Methods for details). (f) Expression levels of GSN and ANXA1 in CD14+ EVs. \* $p < 0.05$ ,  
367 \*\* $p < 0.01$ , \*\*\* $p < 0.001$ ; Mann Whitney test, mean  $\pm$  SEM, n=3 distinct EV preparations.

368

369 To determine the cell source of these exemplar proteins, surface staining and  
370 intracellular staining of human monocytes and platelets aggregates was performed  
371 by microscopy. While ANXA1 was selectively expressed, to a high abundance, by  
372 monocytes (Fig. 7a,b), the majority of GSN seemed to be expressed by platelets  
373 both intracellularly and on their cell surface (Fig. 7a,b), while only a small amount  
374 was associated to monocytes likely because adherent to platelets. Similar results  
375 were also shown by Western blot when the same proteins were investigated in  
376 platelet or monocyte (the latter containing residual platelets) lysates. Loading of

Oggero et al., v1

377 decreasing concentrations of monocyte and platelet whole lysates revealed GSN to  
378 be highly expressed in platelets, and as described by the immunofluorescence  
379 results, only a small amount of it was detected in the monocyte lysates possibly  
380 because of platelet contamination (Fig 7c). Conversely, monocyte lysates contained  
381 a consistent higher amount of ANXA1 represented by both the 38kDa and the 34kDa  
382 bands (Fig 7c). Interestingly, platelet extracts displays only minimal amounts of the  
383 cleaved form of ANXA1 (Fig 7d).

384 **Figure 7. Selective expression of Annexin A1 (ANXA1) and Gelsolin (GSN) in human**  
385 **monocytes and platelets.** The monocyte preparation, that contains platelet, was prepared  
386 as in Figure 2. Cells were permeabilised or left intact prior to staining for ANXA1 and GSN,  
387 prior to imaging. (a) Surface staining for ANXA1 (red) and GSN (green) in monocytes/  
388 platelets aggregates. (b) Intracellular staining for ANXA1 (red) and GSN (green) in  
389 monocytes/ platelets aggregates. DAPI counterstaining (blue) indicates cell nuclei.  
390 Representative of three distinct cell preparations. Scale bar = 10  $\mu$ m. (c) Western blot  
391 analysis for ANXA1 and GSN in monocyte and platelet lysates. (d) Densitometry analysis,  
392 ACTB1 was used as loading control. (\* $p < 0.05$ , \*\* $p < 0.01$ , \*\*\* $p < 0.001$ , Mann Whitney test,  
393 mean  $\pm$  SEM of  $n=5$  with different donor cells).

394

395 In supplementary Table S6 we compare our data with other previously published  
396 proteomics data conducted on EVs from THP-1 cells (a surrogate of monocytes) and  
397 platelets.

399 **Discussion**

400 In this study we provide evidence that monocyte/platelet-derived EVs are by and  
401 large pro-inflammatory and can activate not only endothelial cells, but also the  
402 atherosclerotic plaque, inferring a pathogenic role in *in vivo* settings. We further  
403 identify some subtlety in relation to the mode of activation of the monocyte with  
404 particular attention to the presence of an aggregated and/or adherent platelet. Using  
405 a pharmacological approach to preferentially attenuate platelet reactivity, we could  
406 produce EVs with a lower pathogenic impact, at least in the context of an  
407 atherosclerotic plaque activation. These different outcomes were not related to  
408 physicochemical features of the EVs but rather to their composition as indicated by  
409 the proteomic analysis. Since transient aggregates between monocytes and platelets  
410 can form in several settings of vascular inflammation, we propose that this inter-  
411 cellular cross-talk can generate EVs which may extend the patho-physiological  
412 relevance of this event. Clinical management with anti-platelet therapies may have  
413 beneficial effects also through a modulation of the quality of EVs released from  
414 monocytes.

415

416 Monocyte/platelet aggregates are a reported feature of vascular inflammation, being  
417 identified in several pathological settings, both in man and experimental animals. As  
418 an example, an experimental medicine study following kidney transplantation,  
419 revealed that addition of a 4-week anti-platelet therapy to immunosuppressive drugs  
420 reduced monocyte/platelet aggregates as well as several other markers of vascular  
421 inflammation (24). These aggregates have also been reported in stroke (25) and in  
422 heart failure (26). In heart failure, a specific subset of monocyte/platelet aggregates  
423 was negatively correlated with better prognosis, indicating a direct or indirect role for



Oggero et al., v1

424 the aggregates in promoting sustained damage, or reduced repair, of the cardiac  
425 tissue. Finally, circulating monocyte/platelet aggregates have been detected in  
426 hypertension, where an independent predictor for their formation was systemic blood  
427 pressure (27), and in coronary artery disease. In the latter condition,  
428 monocyte/platelet aggregates increase in patients compared to healthy controls  
429 (28,29), an increase quantified to be more than two-fold (30). In all these studies, the  
430 pro-atherogenic properties of the aggregates has been suggested. Of interest,  
431 whereas some of the studies summarised here proposed an initiating role of the  
432 platelets (24,30), there is evidence in the context of coronary artery disease that  
433 indicates monocyte activation as the inciting event, leading to the formation of these  
434 aggregates (31).

435

436 In all cases, monocyte/platelet aggregates and more generally leukocyte/platelet  
437 aggregates, are transient in their association and dissociation. As a relevant  
438 example, Furman *et al* demonstrated that numbers of circulating monocyte/platelet  
439 aggregates in patients with acute myocardial dysfunction were higher within the first  
440 4 hours of acute coronary symptoms and gradually returned to basal values in the 4-  
441 8 hour period post-infarct (32). In a longer prospective study about patients  
442 undergoing elective coronary bypass surgery, the numbers and reactivity of  
443 monocyte/platelet aggregates decreased to basal level after 3 months from surgery  
444 (33). Thus we reasoned that EVs could be represent a viable way to monitor longer-  
445 term effects of aggregates formation, either as a biomarker or as *bona fide* effectors  
446 of pathogenesis. As such we took advantage of the presence of platelets in the  
447 preparations of monocytes purified from human whole blood. A subtle and  
448 sophisticated role for the platelet emerged in these experimental conditions, whereby

Oggero et al., v1

449 attenuation of platelet activation with the prostacyclin analogue did not affect  
450 platelets adhesion to the monocyte, while reducing the generation of EVs. In parallel  
451 experiments, we used PAF. This stimulus activated preferentially the platelet,  
452 produced a much larger number of EVs and specifically of CD41+ EVs: all these  
453 effects were significantly inhibited by prostacyclin. This set of results validated our  
454 conclusion that Iloprost acted predominantly on the platelet, yet it was able to affect  
455 EVs when a myeloid cell stimulus like TNF- $\alpha$  was applied. Monitoring cytokines  
456 released from the monocytes unveiled the inhibitory effect of the Iloprost which  
457 added further substance to this conclusion. Altogether we have a system where with  
458 TNF- $\alpha$ , we stimulate the monocyte predominantly, but there is a 'co-stimulatory'  
459 action attained by the adherent platelets. These data are in agreement with a  
460 proposed cross-talk in plaque formation and progression, whereby the platelet  
461 adherent to the monocyte favours migration of the leukocyte into the plaque, which  
462 would then develop to macrophages (34–36). Platelet-delivery of cholesterol could  
463 feed forward the process of macrophage differentiation into a foam cells (37). Here  
464 we reasoned that one downstream result of platelet/monocyte aggregate formation  
465 would be production of pro-inflammatory EVs.

466

467 When EVs generated from the different *in vitro* incubation protocols were analysed  
468 by Nanosight™ a relatively similar size was measured, with no major differences in  
469 median and mode of the distribution when TNF- $\alpha$  or PAF were applied as stimuli, in  
470 the presence or absence of prostacyclin analogue. In all cases, an average diameter  
471 of >100 nm was quantified suggesting that EVs produced are predominantly formed  
472 by membrane-spawn vesicles and not by exosomes (23). This evidence was  
473 corroborated by the proteomic analysis and further validated by Western blot, which

Oggero et al., v1

474 identified ANXA1 in all subsets of EVs, with no significant changes across the  
475 groups. A recent elegant study identified ANXA1 as a genuine marker for  
476 membrane-spawn vesicles, also referred to as microparticles (23). More interesting  
477 to us is the emerging evidence that the same cell can generate EVs which are at  
478 least in part different in relation to the stimulus applied or the microenvironment. Our  
479 own work on neutrophil-derived EVs reported major functional differences between  
480 EVs produced in suspension versus in adhesion settings, with the former being  
481 reparative and anti-inflammatory (Dalli et al. 2013; Headland et al. 2015) while the  
482 latter EVs are mainly pro-inflammatory (6,39). In line with this, in this study, we could  
483 demonstrate that monocyte-derived EVs isolated from mixed platelet/monocyte  
484 aggregates in inflammatory conditions (TNF- $\alpha$ ) bind to and are internalized by  
485 HUVECs. Importantly, EVs isolated from TNF- $\alpha$  treated monocyte/platelet  
486 aggregates, but not from untreated cells or from cells previously treated with Iloprost,  
487 up-regulated ICAM-1 and VCAM-1 expression and increased the release of GM-  
488 CSF, IL-8 and IL-6 from endothelial cell monolayers. Before exploring further the  
489 differences in composition we further tested the potential different effector functions  
490 of TNF- $\alpha$  and Iloprost+TNF- $\alpha$  EVs using an organ culture protocol. For all the  
491 reasoning summarised above we focused on the atherosclerotic plaque.

492

493 There has been quite some interest in EVs and atherosclerosis, mainly with a focus  
494 on vesicles released from the plaque, possibly as a downstream determinant of  
495 pathogenic processes operative within the plaque. Several studies showed that EVs  
496 are mainly derived from leukocytes and i) are endowed with thrombogenic activities  
497 (40), ii) can increase intra-plaque neovascularization and plaque vulnerability, mainly  
498 iii) because they enhance proliferation of endothelial cells and angiogenesis (41)

Oggero et al., v1

499 through the presence of tissue factor activity (42). The leukocyte origin was further  
500 confirmed by Mayr *et al*, using a combination of unbiased analyses to quantify and  
501 qualify the myeloid EV fraction, as well as EVs from smooth muscle cells and  
502 erythrocytes. Metabolomics performed in the same study showed an increase in  
503 taurine, further emphasizing the monocyte/neutrophil-produced oxidative  
504 microenvironment within the atherosclerotic plaque (14). Here we revealed marked  
505 modulatory functions of monocyte EVs applied to the plaque. After 24 h incubation,  
506 the plaque was relatively viable as assessed with both focused and unbiased  
507 approaches, the former being multiple cytokine quantifications, the latter proteomic  
508 analysis, both conducted on plaque supernatants. The induction of several cytokines  
509 by TNF- $\alpha$  EVs is indicative of strong pro-inflammatory actions supporting the  
510 hypothesis that if generated within the plaque (perhaps from the extravasating  
511 monocyte bearing platelets on its surface) or migrated to the plaque, these vesicles  
512 can fuel local inflammatory processes. The increase in IL-6 is remarkable and fits  
513 with several studies that identify the importance of this cytokine in the development  
514 of atherosclerosis. Exogenously administered IL-6 significantly enhances (~5-fold)  
515 the development of fatty lesions in mice (43). The pathogenic properties of IL-6  
516 through enhancing endothelial dysfunction and aortic stiffness was demonstrated in  
517 rheumatoid arthritis patients treated with the IL-6 receptor inhibitor tocilizumab: the  
518 neutralizing anti-IL-6 therapy successfully reduced articular inflammation and  
519 decreased endothelial dysfunction, measured as impaired flow mediated dilatation  
520 and aortic stiffness by pulse wave velocity (44). A recent Mendelian randomized  
521 study, focusing on the single nucleotide polymorphisms in the IL-6 receptor gene,  
522 highlighted loss of function as a viable approach for the prevention of coronary heart  
523 disease (45). It was of great interest to us that the vesicles generated by the

Oggero et al., v1

524 monocyte preparation stimulated with Iloprost+TNF- $\alpha$  displayed a totally different  
525 impact on the plaque. The cytokine response of the plaque was essentially blunted  
526 when compared to that quantified following overnight incubation with TNF- $\alpha$  EVs.

527

528 The fact that TNF- $\alpha$  EVs markedly affected the reactivity of ex vivo cultured  
529 atherosclerotic plaque was further confirmed by proteomic analysis of the  
530 conditioned media with the identification of a 52 significantly modulated proteins in  
531 response to the different EVs subsets. In particular, the proteome of the plaque  
532 conditioned media unveiled modulation of a different group of proteins between TNF-  
533  $\alpha$  and Iloprost+TNF- $\alpha$  EVs with an important distinction. While TNF- $\alpha$  EVs  
534 augmented ~3-fold the levels of fibulin-2 in the plaque supernatants, Iloprost+TNF- $\alpha$   
535 EVs failed to do so, indicating a head-to-head difference in line with the cytokine  
536 analyses. Fibulin-2 is an extracellular matrix protein that has been positively  
537 associated with fibrosis of the myocardium (46). In a model of heart failure, mice  
538 nullified for fibulin-2 are less susceptible to fibrosis while developing hypertrophy to  
539 the same extent as their wild type counterparts. Such an outcome is secondary to  
540 transforming growth factor beta expression in the presence of fibulin-2, together with  
541 potentiation of its signalling in target cells. Moreover, while selective expression of  
542 this protein in the aortic arch vessels it is known already to be associated with the  
543 morphogenic events that regulate heart development, in post-natal life fibulin-2 is  
544 also produced by endothelial cells of the coronary arteries and veins (47). These  
545 properties dovetail with the results obtained by our experiments whereby modulation  
546 of fibulin-2 follows the inflammatory status of the plaque and the regulation afforded  
547 by distinct types of EVs. Furthermore, the fact that fibulin-2 is required for higher  
548 deposition of collagen-I and collagen-III in cardiac fibrosis corroborate the

Oggero et al., v1

549 pathogenic role that this protein may have in plaque formation and/or progression.  
550 One would derive that strategies to modulate fibulin-2 levels within the plaque,  
551 perhaps through delivery of antisense or blocking strategies with natural or semi-  
552 synthetic vesicles (47,48), could be a viable therapeutic approach to impact on the  
553 progression of atherosclerosis.

554

555 Finally, the experiments presented and discussed above justified an in-depth  
556 analysis of the potential differences between TNF- $\alpha$  EVs and Iloprost+TNF- $\alpha$  EVs.  
557 While we recognise that structural lipids, lipid mediator precursors (49), microRNA  
558 and other nucleic acids (50) could vary between the two vesicle types, as a proof-of-  
559 concept for fundamental differences in composition, we analysed their protein  
560 contents. In general a lower number of significantly modulated proteins were  
561 detected in Iloprost+TNF- $\alpha$  EVs compared to TNF- $\alpha$  EVs suggesting that attenuation  
562 of platelet activation not only reduced the number of CD14+ and CD14/CD41+ EVs,  
563 but also modified the actual composition of these microstructures. Addition of Iloprost  
564 reduced the number of proteins exclusively identified in monocyte EVs from 10  
565 proteins to 2. Comparison with published proteomic lists revealed interesting  
566 overlaps. As an example, THP-1 monocytic cells stimulated with lipopolysaccharide  
567 yield EVs that contain EEF1B2 (an elongation factor) and PSMC2 (proteasome  
568 subunit) (51), two of the proteins uniquely identified here for TNF $\alpha$  EVs. Out of six  
569 studies of platelet EVs, we focused on two studies (52,53) where similar preparation  
570 protocols were applied for the generation of the EVs. Thus, INA (cytoskeleton  
571 component) uniquely identified in Iloprost+TNF- $\alpha$  EVs was identified by Pienimaeki-  
572 Roemer *et al.* in senescent platelet EVs (52). Platelet EVs also express PSMC2 as  
573 well as AP2M1 (vesicle transporter) and PSMB6 (another proteasome subunit) (52).

Oggero et al., v1

574 Similar overlaps were noted for the proteins modulated in both subgroups of EVs  
575 analysed here, as reported in Table S6. An interesting hit was gelsolin, detected in  
576 more abundance in Iloprost+TNF- $\alpha$  EVs and also in plaques treated with this EV  
577 subset: this protein is endowed with anti-inflammatory properties and has been  
578 identified in resolving inflammatory exudates (54). In this study, addition of gelsolin to  
579 chondrocytes exerted positive modulation of extracellular matrix protein deposition  
580 while inhibiting metalloproteases and other catabolic enzymes. In the context of an  
581 atherosclerotic plaque, such a profile would yield a stabilizing effect. In fact,  
582 published data using proteomic approaches have reported gelsolin downregulation in  
583 atherosclerotic coronary arteries compared to pre-atherosclerotic coronaries and  
584 mammarys (55). The same authors demonstrated how reduction in gelsolin levels  
585 caused i) cytoskeleton deregulation within the human atherosclerotic coronary media  
586 layer and ii) switch of medial vascular smooth muscle cells from a contractile to a  
587 synthetic phenotype (proinflammatory) (56). Furthermore, circulating levels of  
588 gelsolin are reduced in patients with a diagnosis of asymptomatic carotid artery  
589 plaque (57) and in patient with ankylosing spondylitis undergoing TNF- $\alpha$  antagonist-  
590 infliximab therapy when compared to healthy matched controls (58).

591

592 Collectively these data strengthen the close relationship between monocytes and  
593 platelets for the generation of EVs which may be of mixed origin, with proteins that  
594 may derive from one cell or the other. As such future studies may focus on the  
595 biogenesis of EVs from the aggregates and perhaps reveal a common budding  
596 process into the vesicles that emerge from them.

597

Oggero et al., v1

598 In conclusion, the activating effect of monocyte-derived vesicles on the reactivity of  
599 the atherosclerotic plaque reflects the contribution of platelet adhesion.  
600 Monocyte/platelet aggregates, accepted as a predictive marker of several  
601 cardiovascular pathologies including coronary artery disease, may have longer  
602 lasting pathogenic effects through generation of vesicles which may propagate pro-  
603 inflammatory actions. Modulation of platelet reactivity could help attenuating the  
604 detrimental properties of these vesicles.

605

## 606 **Material and methods.**

607 Monocyte purification and flow cytometry characterization. All volunteers gave  
608 written, informed consent to blood collection and the procedure was approved by the  
609 Queen Mary Ethics of Research Committee (QMERC2014.61) for healthy controls.  
610 Blood (30 ml) was drawn from healthy volunteers using a 19G butterfly needle with  
611 tourniquet applied and anticoagulated with 0.32% w/v sodium citrate. To inhibit  
612 platelet activation, Iloprost™ (2µM; stable prostacyclin analogue; Sigma-Aldrich,  
613 Gillingham, UK) was added to whole blood prior cell separation. The blood was, then  
614 centrifuged at 150 xg for 20 min and the platelet rich plasma (PRP) removed and  
615 replaced with PBS+1mM EDTA. Following another centrifugation step, RosetteSep™  
616 cocktail (15028, StemCell Technology, Vancouver, Canada) was added (50 µl/ml of  
617 blood) and samples rested at room temperature for 20 mins. Blood was then diluted  
618 1:1 with PBS+1mM EDTA and layered over 15 ml Histopaque 1077 (Sigma-Aldrich,  
619 Gillingham, UK), centrifuged for 20 min at 1200 xg room temperature to separate  
620 monocytes from other cells. The monocyte layer was harvested and washed at 300  
621 xg for 10 min. Following another washing step, the monocyte pellet was re-



Oggero et al., v1

622 suspended in phenol red-free RPMI (Gibco, Waltham, US) and the concentration  
623 adjusted as needed.

624

625 For peripheral blood mononuclear cells (PBMCs) isolation, whole blood was  
626 centrifuged at 130  $\times g$  for 20 minutes and plasma was removed. For every 30 ml of  
627 whole blood, erythrocytes were depleted by sequentially layering 10 ml PBS followed  
628 by 8 ml of 6% w/v dextran (high molecular weight, Sigma-Aldrich, in PBS) and gently  
629 inverting. After 15 min, the leukocyte-rich fraction was collected and layered over  
630 Histopaque 1077 and centrifuged for 30 minutes 450  $\times g$  at room temperature to  
631 separate granulocytes from PBMC. PBMCs were washed once by centrifuging at  
632 300  $\times g$  and resuspended in RPMI for further use. For polymorphonuclear cells  
633 (PMN) isolation, whole blood was centrifuged at 130  $\times g$  for 20 min, plasma removed,  
634 erythrocytes depleted on 6% w/v dextran (high molecular weight, Sigma-Aldrich, in  
635 PBS). Then, the leukocyte-rich fraction was layered over Histopaque and centrifuged  
636 for 30 min 450  $\times g$  at room temperature. The PMN layer was harvested, washed and  
637 cell concentration adjusted as needed.

638 After isolation cells were treated with Fc receptor blocking solution and stained with  
639 anti-CD14-APC (2  $\mu g/ml$ , 61D3; Biolegend, San Diego, USA), anti-CD41-PE  
640 (2  $\mu g/ml$ , HIP8; Biolegend), anti P-selectin-FITC or anti-PSGL1-PE (2.5 and 1.5  
641  $\mu g/ml$ , AC1.2 and KLP-1 respectively; Becton Dickinson, Franklin Lakes, USA). Cells  
642 were acquired on an LSR Fortessa cytometer.

643

644 For platelet isolation, PRP was isolated directly from blood by centrifugation as  
645 above. PRP was further processed into washed platelets (WP) by addition of 2  $\mu g/ml$   
646 iloprost and 0.02U/ml apyrase (M0398S, NEB), prior to centrifugation at 1000  $\times g$  for

Oggero et al., v1

647 10 minutes. Pellets were re-suspended in modified HEPES Buffer containing Iloprost  
648 and apyrase and washed a second time. Platelet were then counted, and  
649 concentration was adjusted to  $3 \times 10^8$ /mL before stimulating.

650

651 Fluorescent microscopy analysis of monocytes and platelets. Isolated monocytes  
652 containing platelets were spotted on Alcian blue-coated glass slides and fixed in cold  
653 4% paraformaldehyde (4 °C, 30 min). After fixation, cells were washed with PBS and  
654 then blocked in PBS with 0.2% BSA (for surface staining) or PBS with 0.1% Triton  
655 and 0.2% BSA (T-PBS; for intracellular staining) for 30 min at room temperature  
656 shaking. Following blocking, monocytes and platelets were incubated with primary  
657 specific antibodies against Annexin A1 (ANXA1; 5 µg/ml; clone 1B, in house  
658 generated) and Gelsolin (GSN; 1.54 µg/ml clone EPR1942; Abcam, Cambridge, UK)  
659 in either PBS+0.2% BSA or T-PBS+0.2% BSA overnight at 4 °C. The cells were then  
660 washed and incubated with secondary antibody Alexa Fluor 488 anti-rabbit (5 µg/ml,  
661 Molecular Probes Invitrogen, Eugene, USA) or Alexa Fluor 592 anti-mouse (5 µg/ml,  
662 Molecular Probes Invitrogen) in T-PBS+0.2% BSA for 1 h at 20 °C shaking. Cells  
663 were then mounted with a glass coverslip using Fluoroshield™ Histology Mounting  
664 Medium with DAPI (Sigma-Aldrich) and visualized under the microscope Zeiss  
665 LSM800 Imaging System.

666

667 Western blot analysis of monocytes and platelets. Presence GSN and ANXA1 was  
668 confirmed through standard SDS-PAGE (Millipore, Watford, UK), loading extracts  
669 from 30µg, 10 µg, 3µg and 1 µg of isolated monocyte or washed platelet lysates.  
670 Western blot was conducted with specific antibodies against ANXA1 (ANXA1; 5  
671 ng/ml; clone 1B), GSN ( 1.54 ng/ml clone EPR1942; Abcam, Cambridge, UK), or

Oggero et al., v1

672 anti- $\beta$ -actin (ACTB; 5 ng/ml; clone AC-74, Sigma-Aldrich) overnight at 4 °C followed  
673 by a 1 h incubation with either an HRP-conjugated goat anti-mouse IgG or goat anti-  
674 rabbit IgG (Dako, Cambridge, UK). Proteins were detected using Luminata™ Forte  
675 Western HRP Substrate (Millipore, Watford, UK) visualized on Hyperfilm™ (GE  
676 Healthcare, Buckinghamshire, UK).

677

678 Generation and isolation of monocyte EVs. Monocytes ( $1 \times 10^6$  cells/mL) were  
679 incubated with TNF- $\alpha$  (50 ng/mL; Sigma-Aldrich), platelet activator factor (PAF, 1  $\mu$ M;  
680 Cayman Chemical, Ann Arbor, USA) or PBS for 60 min at 37°C. Washed platelets  
681 were incubated with 50 ng/mL TNF- $\alpha$  for 20 min at 37°C. When the prostacyclin  
682 analogue Iloprost was added, it was used at 1  $\mu$ M (Iloprost®; Sigma-Aldrich). Cell  
683 suspensions were centrifuged at 4,400  $xg$  at 4°C for 15 min to pellet cells and/or  
684 platelets, followed by a second centrifugation at 13,000  $xg$  at 4°C for 2 min to remove  
685 remaining contaminants (e.g. apoptotic bodies). EVs were enriched by centrifuging  
686 at 20,000  $xg$  at 4°C for 30 min, the supernatant was removed, and pellets were re-  
687 suspended in filtered sterile PBS.

688

689 Characterization of monocyte-derived EVs.

690 *Nanoparticle tracking analysis for sizing EVs.* Approximately 0.5 ml of EVs  
691 (between  $10^6$  to  $10^8$  vesicles) in suspension were loaded onto the Nanosight NS300  
692 with 488 nm scatter laser and high sensitivity camera (Malvern Instruments Ltd.,  
693 Malvern, UK); five videos of 90 seconds each were recorded for each sample. Data  
694 analysis was performed with NTA2.1 software (Nanosight, Malvern, UK). Software  
695 settings for analysis were the following, Detection Threshold: 5–10; Blur: auto;  
696 Minimum expected particle size: 20 nm.

697 *ImageStream™ analysis for quantification and characterisation of EVs.* EVs were  
698 analysed and counted using fluorescence triggering on an ImageStreamx™ MKII  
699 imaging cytometer as described previously (Headland et al. 2015). Briefly, vesicles  
700 were labelled with 50 µM BODIPY maleimide fluorescein or BODIPY Texas-Red (Life  
701 Technologies, Carlsbad, USA), and acquired as such or after labelling with either  
702 2 µg/ml anti-CD14-APC (61D3; Biolegend), 2 µg/ml anti-CD41-PE (HIP8; Biolegend)  
703 or one of the following Pacific Blue or Alexa Fluor 488 conjugated antibodies: anti-  
704 Annexin A1 (ANXA1; 1 µg/ml; clone 1B), anti-Gelsolin (GSN; 0.1 µg/ml clone  
705 EPR1942; Abcam). Fluorescence minus one (FMO) controls were used for gating all  
706 protein antigen-positive events. Approximately 20,000 events were acquired per  
707 sample.

708 *Proteomic analysis of EVs.* EVs derived from monocytes treated with TNFα in  
709 presence or absence of Iloprost® were pelleted at 20,000 xg for 30 min,  
710 resuspended in 20 µl ice cold RIPA buffer containing protease inhibitor (Sigma  
711 Aldrich). Protein content was measured by spectrophotometry (Nanodrop 2000,  
712 ThermoFisher Scientific, Waltham, USA) selecting Protein A280 program and 50 µg  
713 of proteins were used for trypsin digestion. Mass spectrometry analysis of the  
714 proteins obtained from EVs was performed on tryptic digests obtained using the  
715 Filter Aided Sample Preparation protocol as previously described (59). EVs  
716 proteome profile was determined by LC-MS/MS analysis as previously described in  
717 the methods section All data and materials have been made publicly at the PRIDE  
718 (60) Archive (EMBL-EBI) with the dataset identifier PXD014325.

719 *Western blotting analyses.* Presence of a select group of proteins identified by  
720 proteomic analysis was confirmed through standard SDS-PAGE, loading extracts  
721 from ~30 × 10<sup>6</sup> EVs per lane (Millipore, Watford, UK). Western blot was conducted

Oggero et al., v1

722 with specific antibodies against ANXA1 (ANXA1; 5 µg/ml), GSN ( 1.54 µg/ml clone  
723 EPR1942; Abcam), anti-Heat shock protein β-1 (HSPB1; 5 µg/ml; clone G3.1;  
724 Abcam), or anti-β-actin (ACTB; 5 µg/ml; clone AC-74, Sigma-Aldrich) overnight at 4  
725 °C followed by a 1 h incubation with either an HRP-conjugated goat anti-mouse IgG  
726 or goat anti-rabbit IgG (Dako). Proteins were detected using Luminata™ Forte  
727 Western HRP Substrate (Millipore) visualized on Hyperfilm™ (GE Healthcare).

728

729 Experiments with Human Umbilical Vein Endothelial Cells (HUVEC).

730 *Isolation and culturing of HUVEC.* Cells were freshly isolated from umbilical cords  
731 that were kindly donated by the midwifery staff of the Maternity Unit, Royal London  
732 Hospital (London, UK) with an approved protocol (East London & The City Local  
733 Research Ethics Committee reference 05/Q0603/34 ELCHA). Cells were cultured  
734 0.5% gelatin coated T75 flasks, in 5% CO<sub>2</sub> at 37°C with complete Medium 199  
735 (Gibco, Waltham, USA) containing 100 U penicillin, 100 mg/mL streptomycin, and  
736 2.5 µg/mL fungizone (Gibco) supplemented with 20% Human serum (Sigma-Aldrich,  
737 UK), and used up to passage 4.

738 *Assessment of adhesion molecule expression by flow cytometry.* HUVEC were  
739 grown to confluence in 6 well plate coated with 0.5% gelatin and stimulated 24 hours  
740 with TNF-α (10 ng/mL), or 10x10<sup>6</sup> EVs isolated from monocyte-platelet aggregates  
741 subsequent to stimulation with vehicle, TNF-α, or iloprost+TNF-α, in 0.5% human  
742 serum complete media, as described above. After isolation cells were treated with  
743 Fc receptor blocking solution and stained with anti-ICAM-1- PE (1 µg/ml, HA58;  
744 Biolegend, San Diego, USA), anti-VCAM-1- BV711 (0.5 µg/ml, 5110C9; Optibuilt,  
745 USA). Cells were acquired on an LSR Fortessa cytometer.

Oggero et al., v1

746 *Confocal imaging of EV uptake.* HUVEC were seeded overnight on 0.5% Gelatin  
747 coated  $\mu$ -Slide 8 Well Glass Bottom (80826, Ibidi) at a concentration of  $1 \times 10^5$ . Cells  
748 were stimulated with  $1 \times 10^6$  EV previously stained with 2.5  $\mu$ M BODIPY-FITC for 20  
749 min and pelleted at 20,000  $xg$  for 30 minutes at 4°C. Subsequently, the cells were  
750 fixed with 4% PFA for 15 min and blocked and permeabilised with PBS containing  
751 2% BSA and 0.1% Triton-X for one hour. Cells were finally stained with 1.5 nM  
752 Phalloidin AF647 (A22287, ThermoFisher Scientific) for 45 minutes. A Nanoimager-S  
753 microscope (ONI, UK) was used for microscopy of the HUVEC using ONI software.  
754 The following excitation/emission conditions were used in conjunction with x100  
755 magnification oil immersion objectives: BODIPY 488/561 and AF647 640/658. The  
756 images acquired were analysed using supplied ONI and ImageJ software packages.  
757 Distinct BODIPY fluorescent (green) points identified by eye in the micrographs were  
758 considered as distinct EV.

759

#### 760 Experiments with the human atherosclerotic plaque.

761 *Isolation and ex vivo culture.* Patients with clinical and angiographic evidence of  
762 atherosclerosis undergoing revascularization surgery were recruited to the study. All  
763 5 patients undergoing carotid or femoral endarterectomy gave written informed  
764 consent. The study was approved by the Ethics Committee of St. Vincent's  
765 University Hospital in Dublin, and in accordance with the International guidelines and  
766 Helsinki Declaration principles. Surgical atherosclerotic plaque samples were  
767 harvested in physiological saline. After dissection, they were stimulated in 24-well  
768 plates for 24 hours at 37°C, 5% CO<sub>2</sub> in RPMI with 0.1% exosome depleted Fetal  
769 Bovine Serum with the different EV subsets ( $10 \times 10^6$  per well), which were isolated  
770 from monocyte-platelet aggregates subsequent to stimulation with vehicle, TNF- $\alpha$ , or

Oggero et al., v1

771 iloprost+TNF- $\alpha$  as described above. After 24 hr incubation, tissues samples and  
772 supernatants were collected and snap frozen in liquid nitrogen for subsequent  
773 analysis by mass spectrometry analysis and multiplex ELISA assay.

774 *Proteomic analysis of plaque supernatants.* Conditioned media obtained from  
775 plaque supernatants (from plaques treated with or without EVs, n=5) was defrosted  
776 at room temperature and centrifuged firstly at 14,000  $xg$  for 2 min to remove debris  
777 and then at 20,000  $xg$  at 4°C to remove residual EVs from both the stimulation and  
778 the exosome depleted FBS, this sequential centrifugation reduced further ~94% the  
779 number of EV contained in the FBS. An equal volume of 20% trichloroacetic acid  
780 was added to the sample and incubated on ice for 1 hr. Samples were centrifuged at  
781 10,000  $xg$  for 15 min at 4°C and washed with 500  $\mu$ l of ice-cold acetone. After 5 min  
782 incubation, proteins were spun for 5 min at 5,000  $xg$  at 4°C, acetone was removed  
783 and pellets were left to dry. Dried protein pellets were re-suspended in 8 M Urea/ 25  
784 mM Tris- HCl, pH 8.2. Disulphide bonds were reduced with 5 mM Dithiothreitol  
785 (DTT) and protected with 15 mM iodoacetamide. Proteins were digested with  
786 sequencing grade trypsin (1:100; Promega, USA) overnight at 37°C and peptides  
787 concentration was checked by spectrophotometry (Nanodrop 2000; ThermoFisher  
788 Scientific, Waltham, USA). Then, 15  $\mu$ g of peptides were purified using ZipTipC18  
789 pipette tips according to manufacturer's instructions (Millipore, Billerica, USA),  
790 resuspended in 2% Acetonitrile/0.1% formic acid solution, prior to injection of 2  $\mu$ g of  
791 purified peptides into an Ultimate3000 nano-LC system coupled to a Q Exactive  
792 mass spectrometer (ThermoFisher Scientific) for mass spectrometry. Peptides were  
793 separated by increasing acetonitrile, 2 to 33%, in a linear gradient of 40 min on a  
794 C18 reverse phase chromatography column packed with 2.4  $\mu$ m particle size, 300 Å  
795 pore size C18 material (Dr Maisch GmbH, Ammerbuch Entringen, Germany) to a

Oggero et al., v1

796 length of 120 mm in a column with a 75  $\mu$ m, using a flow rate of 250 nL/min. All data  
797 were acquired with the mass spectrometer operating in an automatic data dependent  
798 acquisition mode (DDA, shotgun). A full mass spectrometry service scan at a  
799 resolution of 70,000, AGC target 3e6 and a range of m/z 350–1600 was followed by  
800 up to 12 subsequent MS/MS scan with a resolution of 17,500, AGC target 2e4,  
801 isolation window m/z 1.6 and a first fix mass of m/z 100. Dynamic exclusion was set  
802 to 40 s. Mass spectrometry data were processed using label-free quantitation  
803 method in MaxQuant software v.1.3.0.547, using the human Uniprot database  
804 (release 2016\_3). All data and materials have been made publicly available at the  
805 PRIDE Archive (EMBL-EBI)(60) partner repository with the dataset identifier  
806 PXD014324.

807

808 Downstream analysis of proteomic data was performed by Perseus software (version  
809 1.6.0.7). Only the proteins present in at least 50% of the samples in at least one  
810 group (“Untreated” plaque, “TNF- $\alpha$ ”, “PGI<sub>2</sub>”, “TNF- $\alpha$ +PGI<sub>2</sub> EVs treated plaque) were  
811 considered identified. Proteins found to be differentially expressed between groups  
812 (Student’s T-test P<0.05, FDR 0.05) were subjected to enrichment analysis and were  
813 distributed into categories according to cellular component, molecular function,  
814 biological process, KEEG pathways and reactome pathways using PANTHER  
815 (Version 14.1) or STRING Database (Version 10.5). STRING was also used to  
816 generate protein-protein interaction networks.

817 *Multiplex ELISA analysis of plaque and monocyte supernatants.* GM-CSF, IL-6  
818 and IL-8 concentrations from HUVEC conditioned media or GM-CSF, IFN- $\gamma$ , IL-1 $\beta$ ,  
819 IL-4, IL-6, IL-10, IL-13, MIP-1 $\alpha$  and TNF- $\alpha$  concentrations from the centrifuged  
820 conditioned media of the human plaques were measured by enzyme immunoassay



Oggero et al., v1

821 using commercially available human 96 well-plate multiplex kit for tissue culture  
822 samples (MSD, Gaithersburg, USA) according to the manufacturers' guidelines. The  
823 same cytokines plus MCP-1 instead of TNF $\alpha$  were quantified in the monocyte  
824 conditioned media following removal of EVs by centrifugation.

825

826 Statistical analysis. All statistical analysis and graphing were performed in  
827 GraphPad Prism 6 Software, IDEAS 6.2 for Image Stream Plots and FlowJo V6 for  
828 LSRFortessas Plots. Data are expressed as mean  $\pm$  standard error (SEM) unless  
829 stated differently. Analyses applied to the different experimental data are indicated  
830 in each figure legend. A p value of  $< 0.05$  was considered significant to reject the null  
831 hypothesis.

832

### 833 **Data Availability**

834 Mass spectrometry proteomics analysis of monocyte-derived EVs: PRIDE  
835 PXD014324 (<http://www.ebi.ac.uk/pride/archive/projects/PXD014324>)

836

837 Mass spectrometry proteomic analysis of human plaque supernatant: PRIDE  
838 PXD014325 (<http://www.ebi.ac.uk/pride/archive/projects/PXD014325>).

839

### 840 **Acknowledgments.**

841 We thank Mr Joseph Dowdall and Mr Stephen Sheehan, Department of Vascular  
842 Surgery, St Vincent's University Hospital for the provision of material and we thank  
843 Jan Nagenborg and Antonino Cacace for logistic support. The authors acknowledge  
844 the support of the UCD Conway Institute Core Technology mass spectrometry  
845 facilities.

Oggero et al., v1

846 EVOLuTION has received funding from the European Union's Horizon 2020  
847 research and innovation programme under the Marie Skłodowska-Curie grant  
848 agreement No. 675111 (S.O., M.P.). Wellcome Trust (programme 086867/Z/08/Z) to  
849 M.P. The ImageStream™ used was funded by the Wellcome Trust (infrastructure  
850 grant 101604/Z/13/Z). M.deG. is supported by an IRC Government of Ireland  
851 postdoctoral fellowship (IRC GOIPD/2017/1060), E.P.B and C.G are supported by  
852 Science Foundation Ireland grants 15/US/B3130 and 15/IA/3152 and a strategic  
853 research award from JDRF NY, USA. This work has been facilitated by the National  
854 Institute for Health Research Biomedical Research Centre at Barts Hospital NHS  
855 Trust.

856

#### 857 **Author contributions**

858 M.P. devised the project, the main conceptual idea and proof outline. S.O. planned  
859 the project, designed and performed experiments, analysed the data. C.G., helped  
860 supervise the project, designed experiments, analysed the data; D.C. and L.V.N.  
861 designed experiments, analysed the data. M. deG. and E.P.B assisted with *ex vivo*  
862 atherosclerotic plaque experiments and S.M. helped carry out the proteomic  
863 determinations and analyses. T.M.M. helped with the interpretation of the proteomic  
864 data. M.B. helped providing the human samples used in the study. S.O. and M.P.  
865 wrote the manuscript.

866

#### 867 **Conflict of interest:**

868 None.

869

870

871 **References**

- 872 1. Hargett LA, Bauer NN. On the Origin of Microparticles: From “Platelet Dust” to  
873 Mediators of Intercellular Communication. *Pulm Circ.* 2013;3(2):329–40.
- 874 2. Johnstone RM, Adam M, Hammond JR, Orr L, Turbide C. Vesicle formation  
875 during reticulocyte maturation. Association of plasma membrane activities with  
876 released vesicles (exosomes). *J Biol Chem.* 1987;262(19):9412–20.
- 877 3. Raposo G. B lymphocytes secrete antigen-presenting vesicles. *J Exp Med.*  
878 1996;183(3):1161–72.
- 879 4. Pucci F, Garris C, Lai CP, Newton A, Pfirschke C, Engblom C, et al. SCS  
880 macrophages suppress melanoma by restricting tumor-derived vesicle-B cell  
881 interactions. *Science (80- ).* 2016;352(6282):242–6.
- 882 5. Wei H, Malcor J-DM, Harper MT. Lipid rafts are essential for release of  
883 phosphatidylserine-exposing extracellular vesicles from platelets. *Sci Rep.*  
884 2018 Dec 3;8(1):9987.
- 885 6. Dalli J, Montero-Melendez T, Norling L V, Yin X, Hinds C, Haskard D, et al.  
886 Heterogeneity in Neutrophil Microparticles Reveals Distinct Proteome and  
887 Functional Properties. *Mol Cell Proteomics.* 2013 Aug;12(8):2205–19.
- 888 7. Giebel B. On the function and heterogeneity of extracellular vesicles. *Ann*  
889 *Transl Med.* 2017 Mar;5(6):150.
- 890 8. Holnthoner W, Bonstingl C, Hromada C, Muehleder S, Zipperle J, Stojkovic S,  
891 et al. Endothelial Cell-derived Extracellular Vesicles Size-dependently Exert  
892 Procoagulant Activity Detected by Thromboelastometry. *Sci Rep.* 2017 Dec  
893 16;7(1):3707.
- 894 9. Jansen F, Yang X, Hoyer FF, Paul K, Heiermann N, Becher MU, et al.  
895 Endothelial Microparticle Uptake in Target Cells Is Annexin

- 896 I/Phosphatidylserine Receptor Dependent and Prevents Apoptosis.  
897 Arterioscler Thromb Vasc Biol. 2012 Aug;32(8):1925–35.
- 898 10. Collier MEW, Ettelaie C. Induction of Endothelial Cell Proliferation by  
899 Recombinant and Microparticle-Tissue Factor Involves  $\beta$ 1-Integrin and  
900 Extracellular Signal Regulated Kinase Activation. Arterioscler Thromb Vasc  
901 Biol. 2010 Sep;30(9):1810–7.
- 902 11. Wilkins E, L. W, Wickramasinghe K, P B. European Cardiovascular Disease  
903 Statistics 2017. Eur Hear Netw. 2017;
- 904 12. Moore KJ, Tabas I. Macrophages in the pathogenesis of atherosclerosis. Cell.  
905 2011;145(3):341–55.
- 906 13. Jansen F, Li Q, Pfeifer A, Werner N. Endothelial- and Immune Cell-Derived  
907 Extracellular Vesicles in the Regulation of Cardiovascular Health and Disease.  
908 Vol. 2, JACC: Basic to Translational Science. 2017. p. 790–807.
- 909 14. Mayr M, Grainger D, Mayr U, Leroyer AS, Leseche G, Sidibe A, et al.  
910 Proteomics, Metabolomics, and Immunomics on Microparticles Derived From  
911 Human Atherosclerotic Plaques. Circ Cardiovasc Genet. 2009 Aug;2(4):379–  
912 88.
- 913 15. Hoyer FF, Giesen MK, Nunes França C, Lütjohann D, Nickenig G, Werner N.  
914 Monocytic microparticles promote atherogenesis by modulating inflammatory  
915 cells in mice. J Cell Mol Med. 2012;16(11):2777–88.
- 916 16. Headland SE, Jones HR, D'Sa AS V., Perretti M, Norling L V. Cutting-Edge  
917 Analysis of Extracellular Microparticles using ImageStreamX Imaging Flow  
918 Cytometry. Sci Rep. 2015 May 10;4(1):5237.
- 919 17. Wang J-G, Williams JC, Davis BK, Jacobson K, Doerschuk CM, Ting JP-Y, et  
920 al. Monocytic microparticles activate endothelial cells in an IL-1 $\beta$ -dependent

- 921 manner. *Blood*. 2011 Aug 25;118(8):2366–74.
- 922 18. Kuravi SJ, Harrison P, Rainger GE, Nash GB. Ability of Platelet-Derived  
923 Extracellular Vesicles to Promote Neutrophil-Endothelial Cell Interactions.  
924 *Inflammation*. 2019 Feb 14;42(1):290–305.
- 925 19. Dalvi P, Sun B, Tang N, Pulliam L. Immune activated monocyte exosomes  
926 alter microRNAs in brain endothelial cells and initiate an inflammatory  
927 response through the TLR4/MyD88 pathway. *Sci Rep*. 2017 Dec 30;7(1):9954.
- 928 20. Aharon A, Tamari T, Brenner B. Monocyte-derived microparticles and  
929 exosomes induce procoagulant and apoptotic effects on endothelial cells.  
930 *Thromb Haemost*. 2008 Nov;100(5):878–85.
- 931 21. Tang N, Sun B, Gupta A, Rempel H, Pulliam L. Monocyte exosomes induce  
932 adhesion molecules and cytokines via activation of NF- $\kappa$ B in endothelial cells.  
933 *FASEB J*. 2016;30(9):3097–106.
- 934 22. Sun HQ, Yamamoto M, Mejillano M, Yin HL. Gelsolin, a Multifunctional Actin  
935 Regulatory Protein. *J Biol Chem*. 1999 Nov 19;274(47):33179–82.
- 936 23. Jeppesen DK, Fenix AM, Franklin JL, Higginbotham JN, Zhang Q, Zimmerman  
937 LJ, et al. Reassessment of Exosome Composition. *Cell*. 2019 Apr;177(2):428-  
938 445.e18.
- 939 24. Graff J, Harder S, Wahl O, Scheuermann EH, Gossmann J. Anti-inflammatory  
940 effects of clopidogrel intake in renal transplant patients: Effects on platelet-  
941 leukocyte interactions, platelet CD40 ligand expression, and proinflammatory  
942 biomarkers. *Clin Pharmacol Ther*. 2005;78(5):468–76.
- 943 25. Franks ZG, Campbell RA, Weyrich AS, Rondina MT. Platelet-leukocyte  
944 interactions link inflammatory and thromboembolic events in ischemic stroke.  
945 *Ann N Y Acad Sci*. 2010 Oct;1207:11–7.

- 946 26. Wrigley BJ, Shantsila E, Tapp LD, Lip GYH. Increased Formation of monocyte-  
947 platelet aggregates in ischemic heart failure. *Circ Hear Fail*. 2013;6(1):127–35.
- 948 27. Gkaliagkousi E, Corrigan V, Becker S, De Winter P, Shah A, Zamboulis C, et  
949 al. Decreased platelet nitric oxide contributes to increased circulating  
950 monocyte-platelet aggregates in hypertension. *Eur Heart J*. 2009;30(24):3048–  
951 54.
- 952 28. Czepluch FS, Kuschicke H, Dellas C, Riggert J, Hasenfuss G, Schäfer K.  
953 Increased proatherogenic monocyte-platelet cross-talk in monocyte  
954 subpopulations of patients with stable coronary artery disease. *J Intern Med*.  
955 2014;275(2):144–54.
- 956 29. Sarma J, Laan CA, Alam S, Jha A, Fox KAA, Dransfield I. Increased platelet  
957 binding to circulating monocytes in acute coronary syndromes. *Circulation*.  
958 2002;105(18):2166–71.
- 959 30. Furman MI, Benoit SE, Barnard MR, Valeri CR, Borbone ML, Becker RC, et al.  
960 Increased Platelet Reactivity and Circulating Monocyte-Platelet Aggregates in  
961 Patients With Stable Coronary Artery Disease. *J Am Coll Cardiol*. 1998;31(2).
- 962 31. Jurk K, Ritter MA, Schriek C, Van Aken H, Droste DW, Ringelstein EB, et al.  
963 Activated monocytes capture platelets for heterotypic association in patients  
964 with severe carotid artery stenosis. *Thromb Haemost*. 2010;103(6):1193–202.
- 965 32. Furman MI, Barnard MR, Krueger LA, Fox ML, Shilale EA, Lessard DM, et al.  
966 Circulating monocyte-platelet aggregates are an early marker of acute  
967 myocardial infarction. *J Am Coll Cardiol*. 2001 Oct;38(4):1002–6.
- 968 33. Ivert T, Dalén M, Ander C, Stålesen R, Lordkipanidzé M, Hjemdahl P.  
969 Increased platelet reactivity and platelet–leukocyte aggregation after elective  
970 coronary bypass surgery. *Platelets*. 2018 Nov 13;1–7.

- 971 34. Huo Y, Schober A, Forlow SB, Smith DF, Hyman MC, Jung S, et al. Circulating  
972 activated platelets exacerbate atherosclerosis in mice deficient in  
973 apolipoprotein E. *Nat Med.* 2003;9(1):61–7.
- 974 35. da Costa Martins P, van den Berk N, Ulfman LH, Koenderman L, Hordijk PL,  
975 Zwaginga JJ. Platelet-Monocyte Complexes Support Monocyte Adhesion to  
976 Endothelium by Enhancing Secondary Tethering and Cluster Formation.  
977 *Arterioscler Thromb Vasc Biol.* 2004 Jan;24(1):193–9.
- 978 36. Passacuale G, Vamadevan P, Pereira L, Hamid C, Corrigall V, Ferro A.  
979 Monocyte-Platelet Interaction Induces a Pro-Inflammatory Phenotype in  
980 Circulating Monocytes. Xu Q, editor. *PLoS One.* 2011 Oct 12;6(10):e25595.
- 981 37. Badrnya S, Schrottmaier WC, Kral JB, Yaiw K-C, Volf I, Schabbauer G, et al.  
982 Platelets Mediate Oxidized Low-Density Lipoprotein–Induced Monocyte  
983 Extravasation and Foam Cell Formation. *Arterioscler Thromb Vasc Biol.* 2014  
984 Mar;34(3):571–80.
- 985 38. Headland SE, Jones HR, Norling L V., Kim A, Souza PR, Corsiero E, et al.  
986 Neutrophil-derived microvesicles enter cartilage and protect the joint in  
987 inflammatory arthritis. *Sci Transl Med.* 2015 Nov 25;7(315):315ra190-  
988 315ra190.
- 989 39. Dalli J, Norling L V, Montero-Melendez T, Canova DF, Lashin H, Pavlov AM, et  
990 al. Microparticle alpha-2-macroglobulin enhances pro-resolving responses and  
991 promotes survival in sepsis. *EMBO Mol Med.* 2014 Jan;6(1):27–42.
- 992 40. Leroyer AS, Isobe H, Lesèche G, Castier Y, Wassef M, Mallat Z, et al. Cellular  
993 Origins and Thrombogenic Activity of Microparticles Isolated From Human  
994 Atherosclerotic Plaques. *J Am Coll Cardiol.* 2007 Feb;49(7):772–7.
- 995 41. Leroyer AS, Rautou P-E, Silvestre J-S, Castier Y, Lesèche G, Devue C, et al.

- 996 CD40 Ligand+ Microparticles From Human Atherosclerotic Plaques Stimulate  
997 Endothelial Proliferation and Angiogenesis. *J Am Coll Cardiol.* 2008  
998 Oct;52(16):1302–11.
- 999 42. Morel O, Toti F, Bakouboula B, Grunebaum L, Freyssinet J-M. Procoagulant  
1000 Microparticles: ‘Criminal Partners’ in Atherothrombosis and Deleterious  
1001 Cellular Exchanges. *Pathophysiol Haemost Thromb.* 2006;35(1–2):15–22.
- 1002 43. Huber SA, Sakkinen P, Conze D, Hardin N, Tracy R. Interleukin-6 Exacerbates  
1003 Early Atherosclerosis in Mice. *Arterioscler Thromb Vasc Biol.* 1999  
1004 Oct;19(10):2364–7.
- 1005 44. Protogerou AD, Zampeli E, Fragiadaki K, Stamatelopoulos K, Papamichael C,  
1006 Sfikakis PP. A pilot study of endothelial dysfunction and aortic stiffness after  
1007 interleukin-6 receptor inhibition in rheumatoid arthritis. *Atherosclerosis.* 2011  
1008 Dec;219(2):734–6.
- 1009 45. Swerdlow DI, Holmes M V., Kuchenbaecker KB, Engmann JEL, Shah T, Sofat  
1010 R, et al. The interleukin-6 receptor as a target for prevention of coronary heart  
1011 disease: a mendelian randomisation analysis. *Lancet.* 2012  
1012 Mar;379(9822):1214–24.
- 1013 46. Khan SA, Dong H, Joyce J, Sasaki T, Chu M-L, Tsuda T. Fibulin-2 is essential  
1014 for angiotensin II-induced myocardial fibrosis mediated by transforming growth  
1015 factor (TGF)- $\beta$ . *Lab Investig.* 2016 Jul 25;96(7):773–83.
- 1016 47. Tsuda T, Wang H, Timpl R, Chu M-L. Fibulin-2 expression marks transformed  
1017 mesenchymal cells in developing cardiac valves, aortic arch vessels, and  
1018 coronary vessels. *Dev Dyn.* 2001 Sep;222(1):89–100.
- 1019 48. Ji H, Chen M, Greening DW, He W, Rai A, Zhang W, et al. Deep Sequencing  
1020 of RNA from Three Different Extracellular Vesicle (EV) Subtypes Released



- 1021 from the Human LIM1863 Colon Cancer Cell Line Uncovers Distinct Mirna-  
1022 Enrichment Signatures. Chen C, editor. PLoS One. 2014 Oct  
1023 17;9(10):e110314.
- 1024 49. Norling L V., Spite M, Yang R, Flower RJ, Perretti M, Serhan CN. Cutting  
1025 Edge: Humanized Nano-Proresolving Medicines Mimic Inflammation-  
1026 Resolution and Enhance Wound Healing. J Immunol. 2011 May  
1027 15;186(10):5543–7.
- 1028 50. Guduric-Fuchs J, O'Connor A, Camp B, O'Neill CL, Medina RJ, Simpson DA.  
1029 Selective extracellular vesicle-mediated export of an overlapping set of  
1030 microRNAs from multiple cell types. BMC Genomics. 2012;13(1):357.
- 1031 51. Bernimoulin M, Waters EK, Foy M, Steele BM, Sullivan M, Falet H, et al.  
1032 Differential stimulation of monocytic cells results in distinct populations of  
1033 microparticles. J Thromb Haemost. 2009;7(6):1019–28.
- 1034 52. Pienimaeki-Roemer A, Kuhlmann K, Böttcher A, Konovalova T, Black A, Orsó  
1035 E, et al. Lipidomic and proteomic characterization of platelet extracellular  
1036 vesicle subfractions from senescent platelets. Transfusion. 2015  
1037 Mar;55(3):507–21.
- 1038 53. Aatonen MT, Öhman T, Nyman TA, Laitinen S, Grönholm M, Siljander PRM.  
1039 Isolation and characterization of platelet-derived extracellular vesicles. J  
1040 Extracell Vesicles. 2014 Jan 6;3(1):24692.
- 1041 54. Kaneva MK, Greco K V., Headland SE, Montero-Melendez T, Mori P,  
1042 Greenslade K, et al. Identification of Novel Chondroprotective Mediators in  
1043 Resolving Inflammatory Exudates. J Immunol. 2017 Apr 1;198(7):2876–85.
- 1044 55. de la Cuesta F, Barderas MG, Calvo E, Zubiri I, Maroto AS, Darde VM, et al.  
1045 Secretome analysis of atherosclerotic and non-atherosclerotic arteries reveals

Oggero et al., v1

- 1046 dynamic extracellular remodeling during pathogenesis. *J Proteomics*. 2012  
1047 Jun;75(10):2960–71.
- 1048 56. de la Cuesta F, Zubiri I, Maroto AS, Posada M, Padiá LR, Vivanco F, et al.  
1049 Deregulation of smooth muscle cell cytoskeleton within the human  
1050 atherosclerotic coronary media layer. *J Proteomics*. 2013 Apr;82:155–65.
- 1051 57. Bhosale SD, Moulder R, Venäläinen MS, Koskinen JS, Pitkänen N, Juonala  
1052 MT, et al. Serum Proteomic Profiling to Identify Biomarkers of Premature  
1053 Carotid Atherosclerosis. *Sci Rep*. 2018 Dec 15;8(1):9209.
- 1054 58. Genre F, López-Mejías R, Miranda-Filloo JA, Ubilla B, Carnero-López B,  
1055 Gómez-Acebo I, et al. Gelsolin levels are decreased in ankylosing spondylitis  
1056 patients undergoing anti-TNF-alpha therapy. *Clin Exp Rheumatol*.  
1057 2014;32(2):218–24.
- 1058 59. Wiśniewski JR, Zougman A, Nagaraj N, Mann M. Universal sample  
1059 preparation method for proteome analysis. *Nat Methods*. 2009 May  
1060 19;6(5):359–62.
- 1061 60. Perez-Riverol Y, Csordas A, Bai J, Bernal-Llinares M, Hewapathirana S,  
1062 Kundu DJ, et al. The PRIDE database and related tools and resources in  
1063 2019: improving support for quantification data. *Nucleic Acids Res*. 2019 Jan  
1064 8;47(D1):D442–50.
- 1065  
1066  
1067  
1068  
1069  
1070  
1071

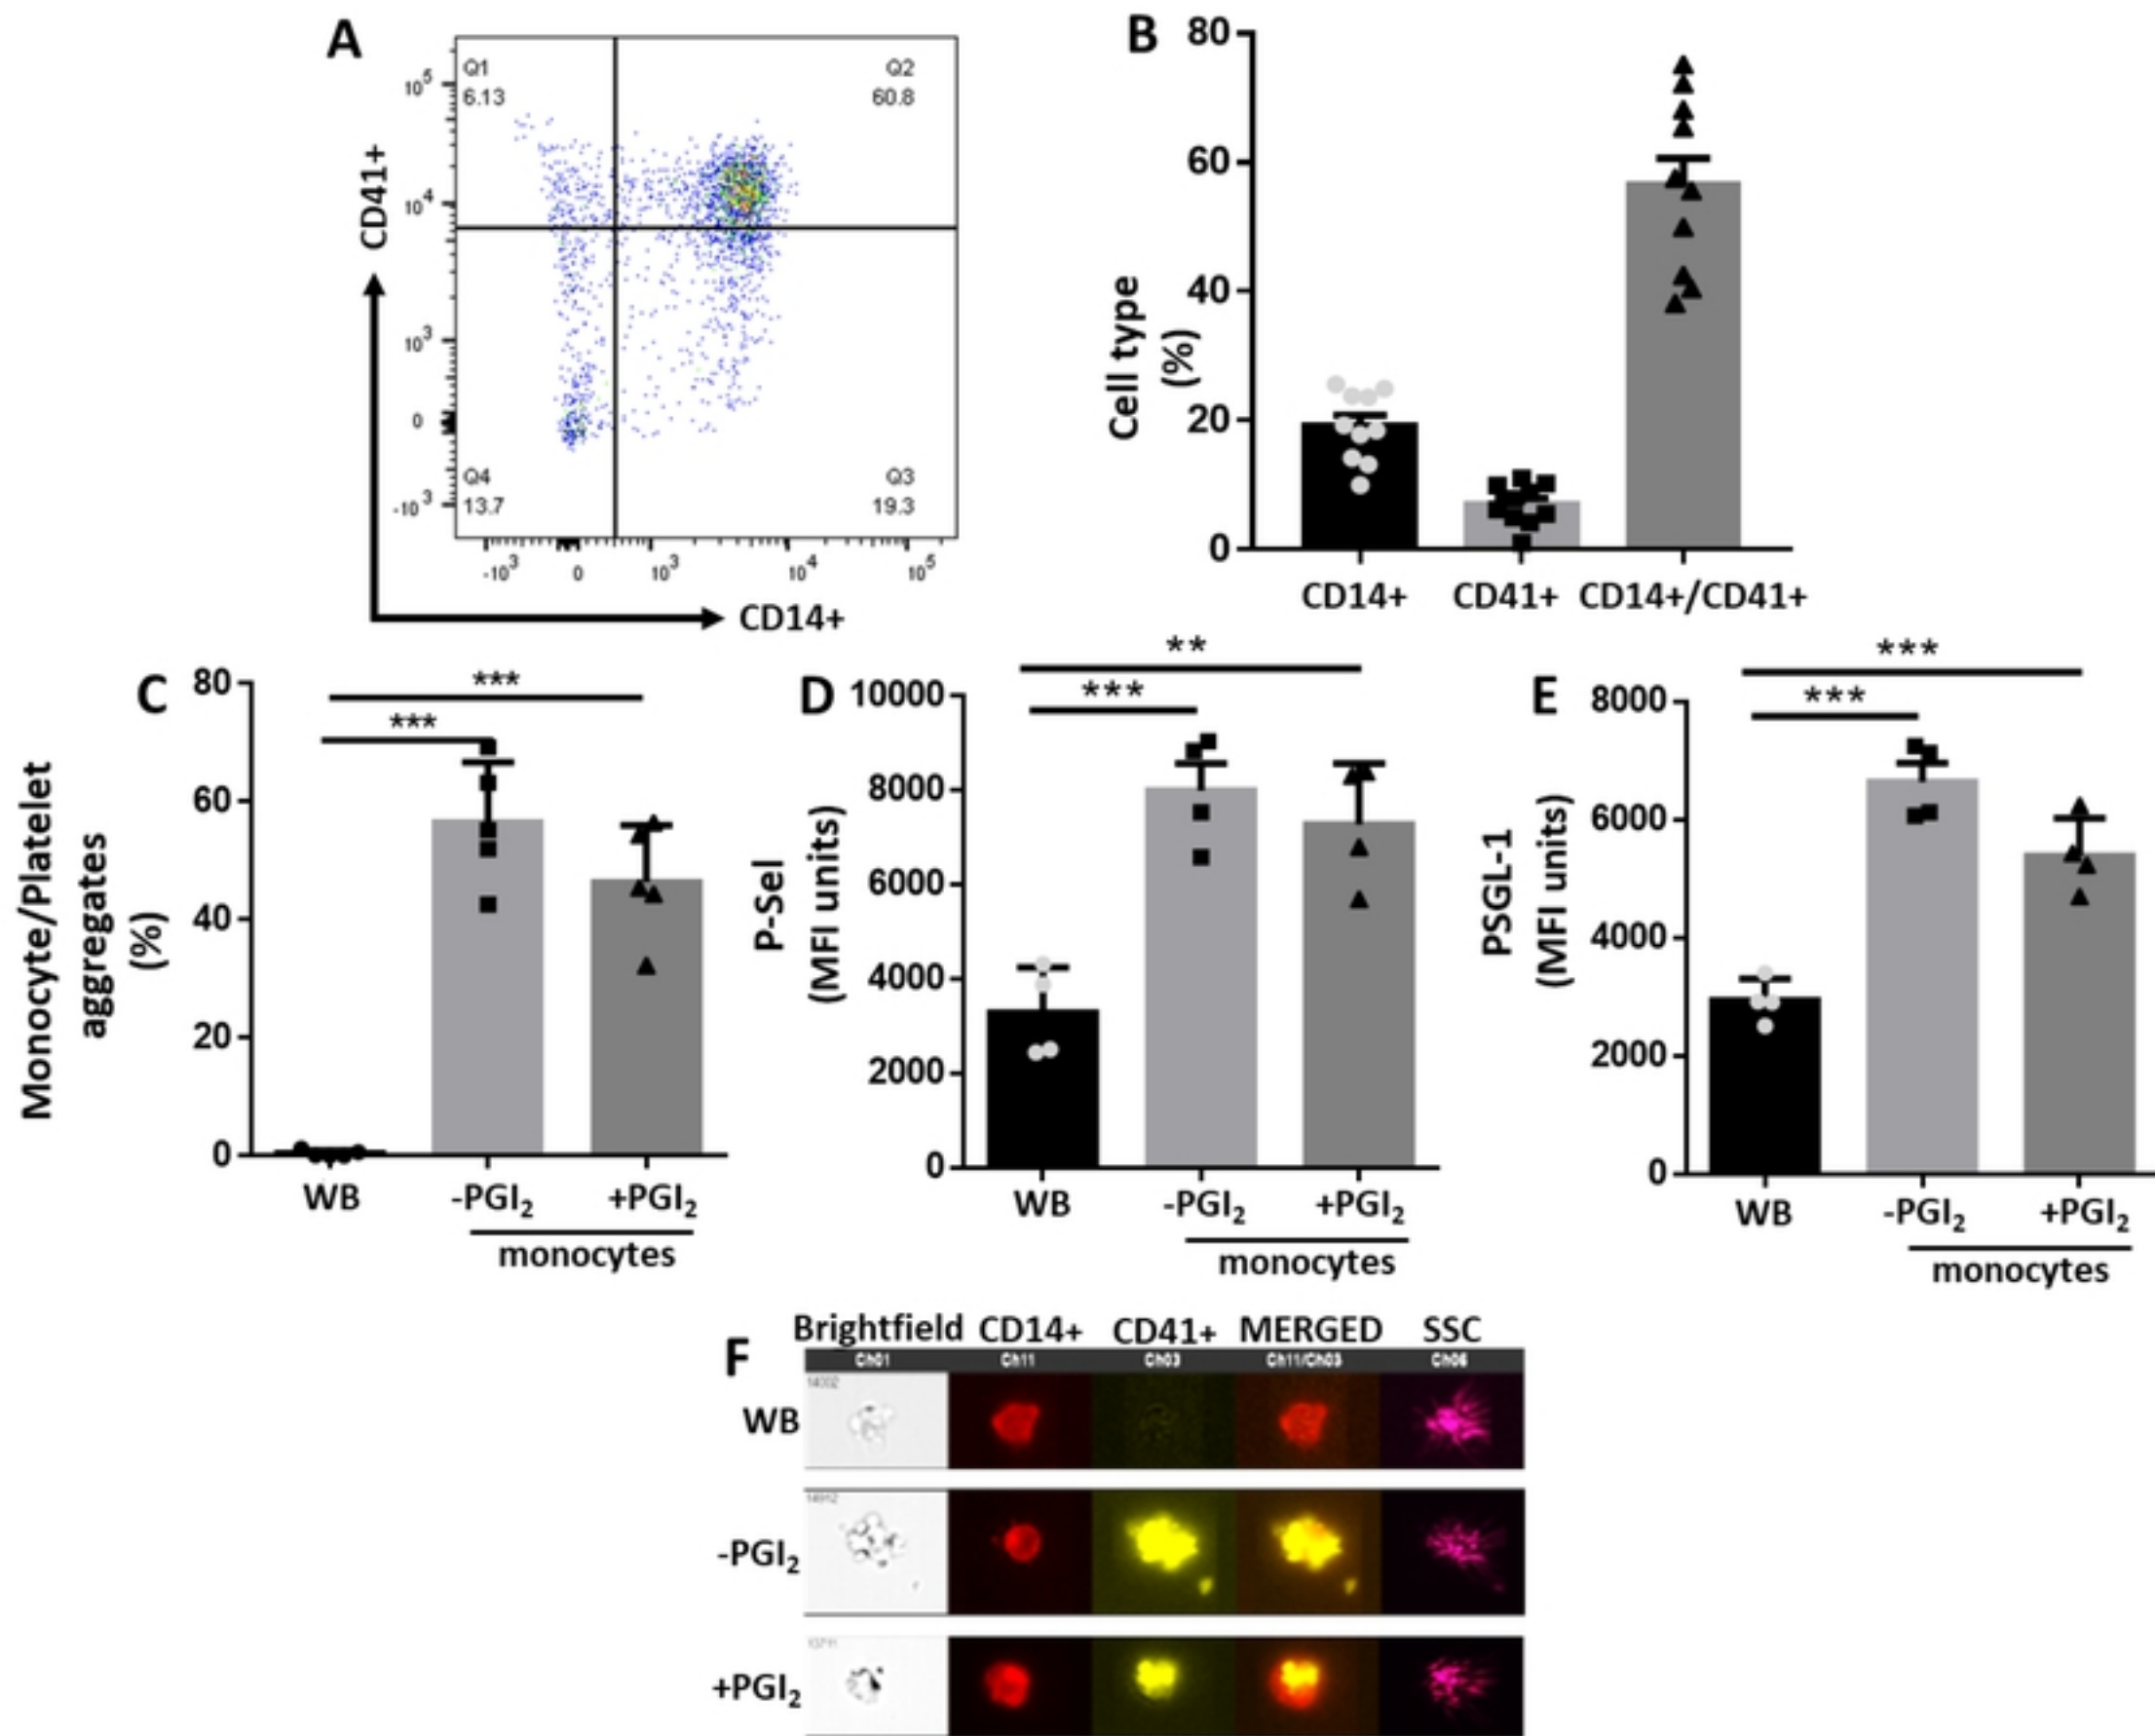

Fig1

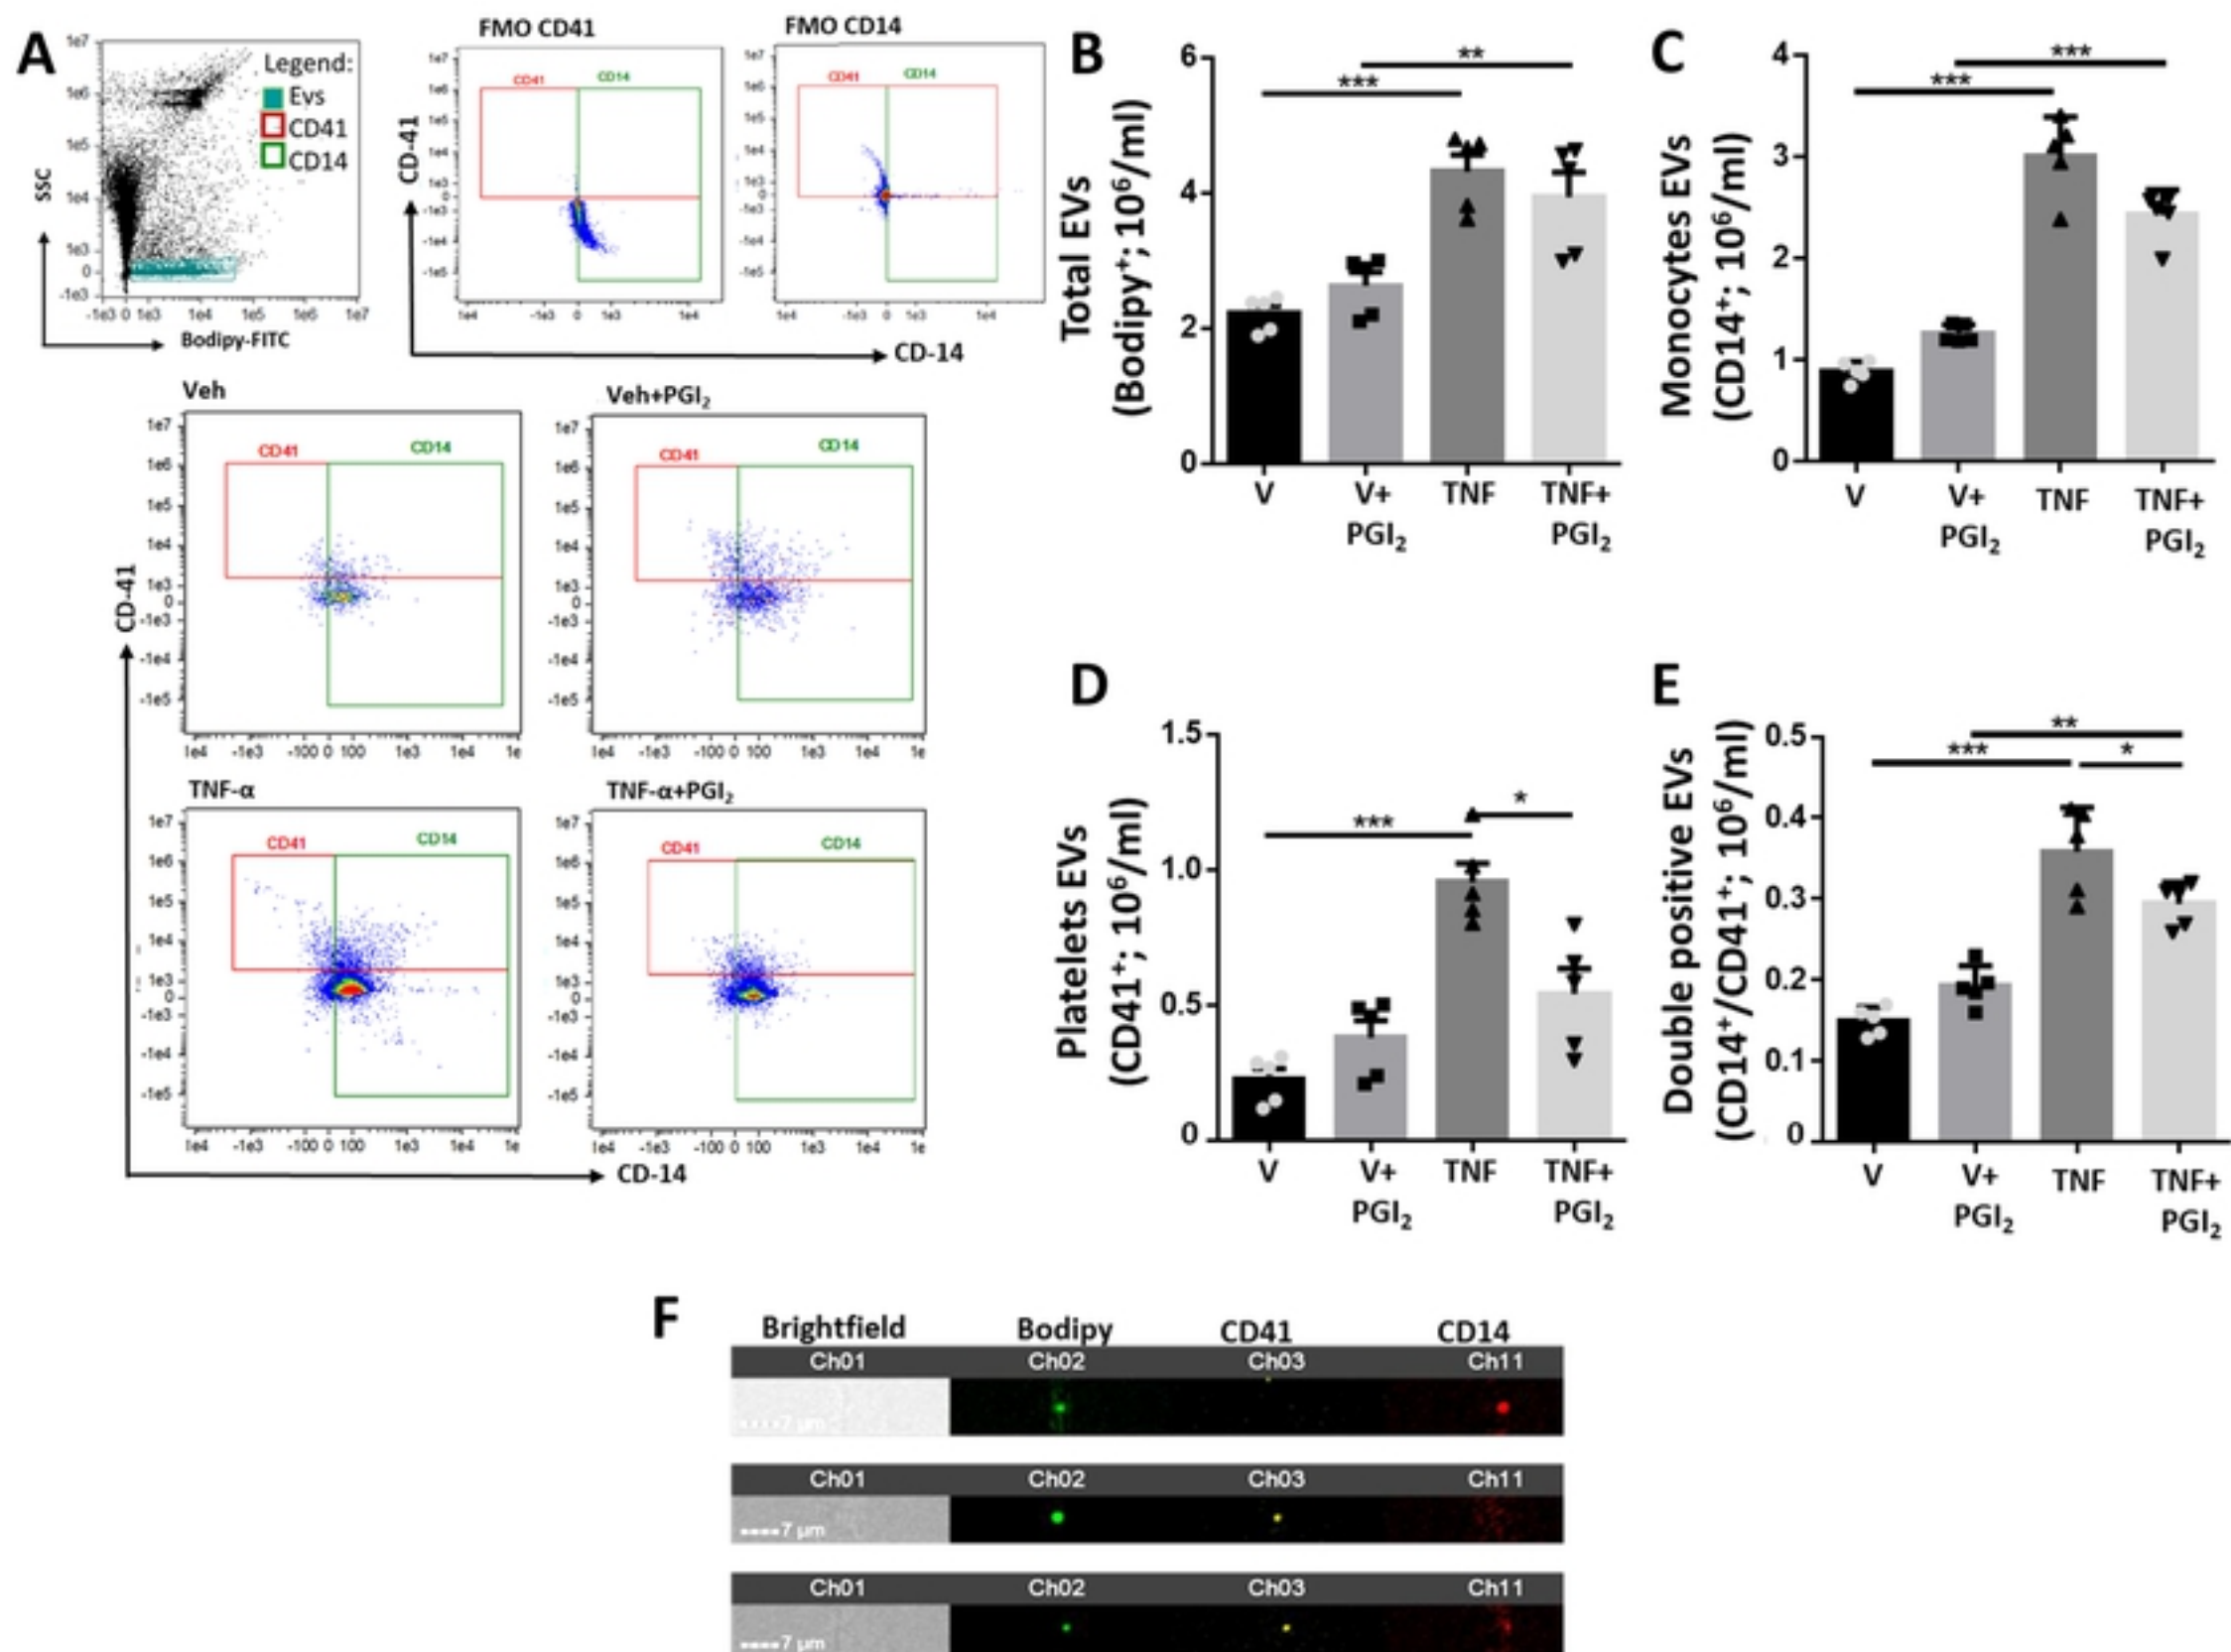

Fig2

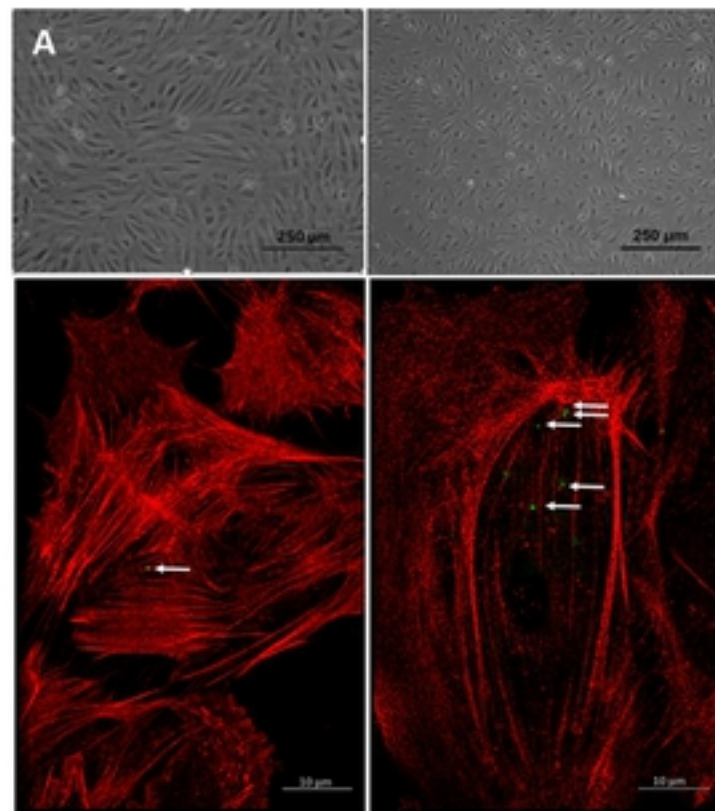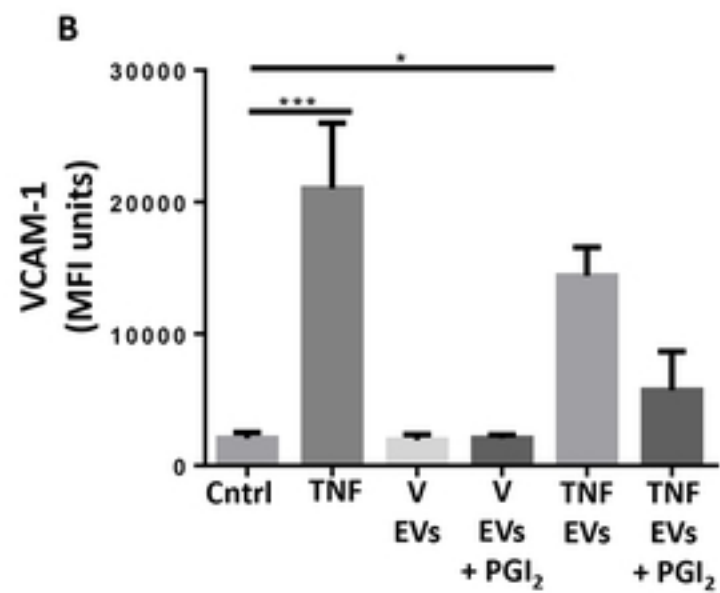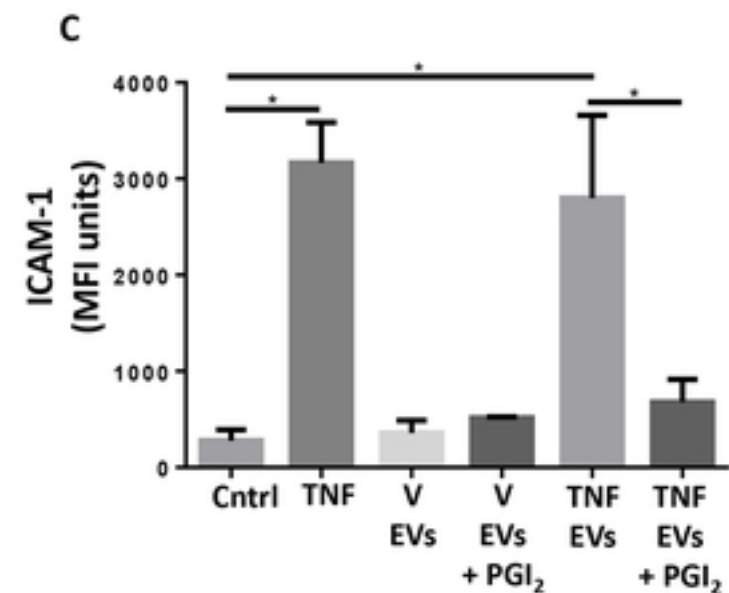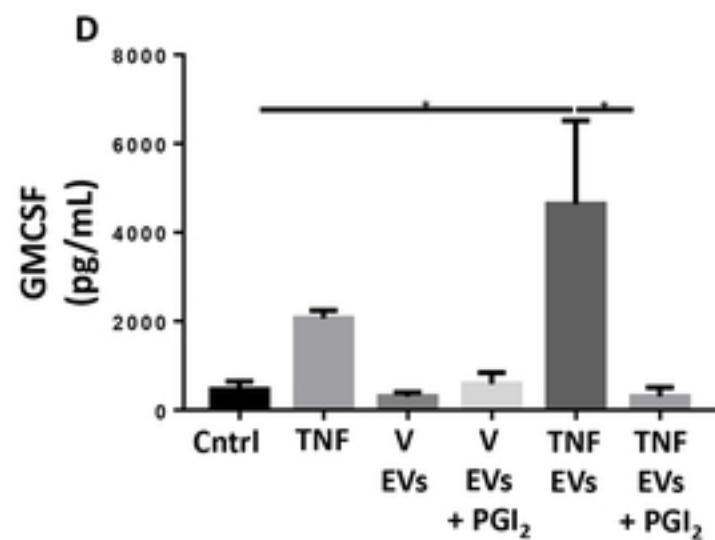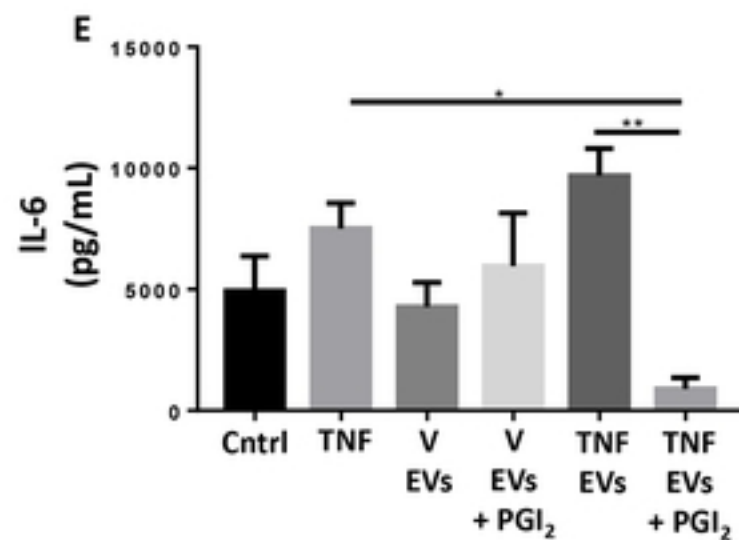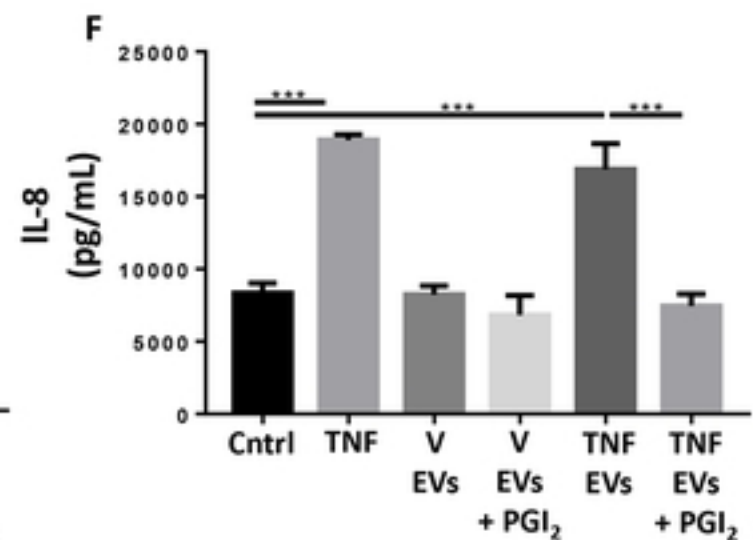

Fig3

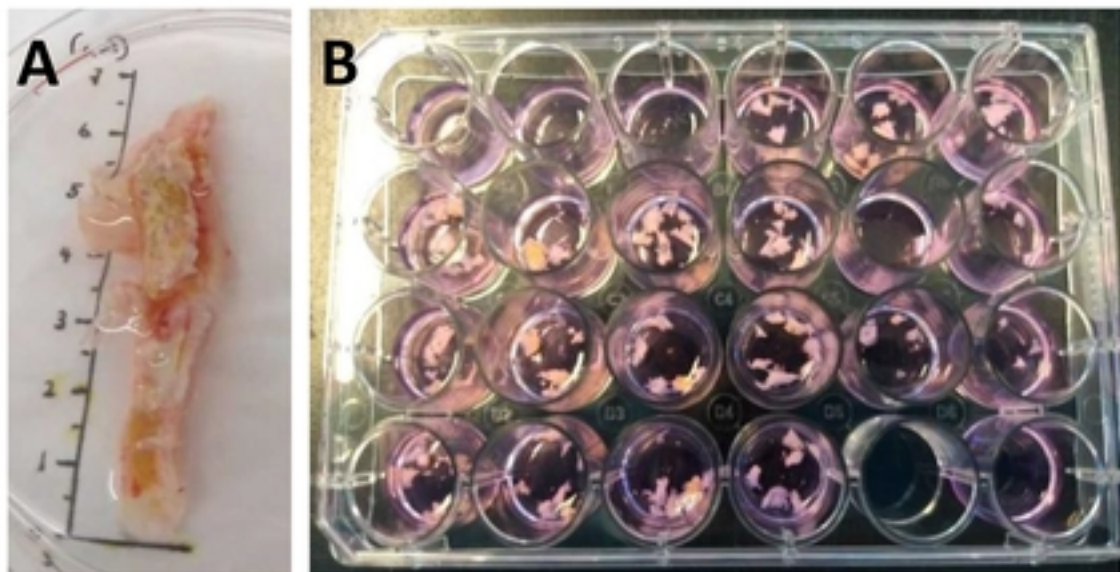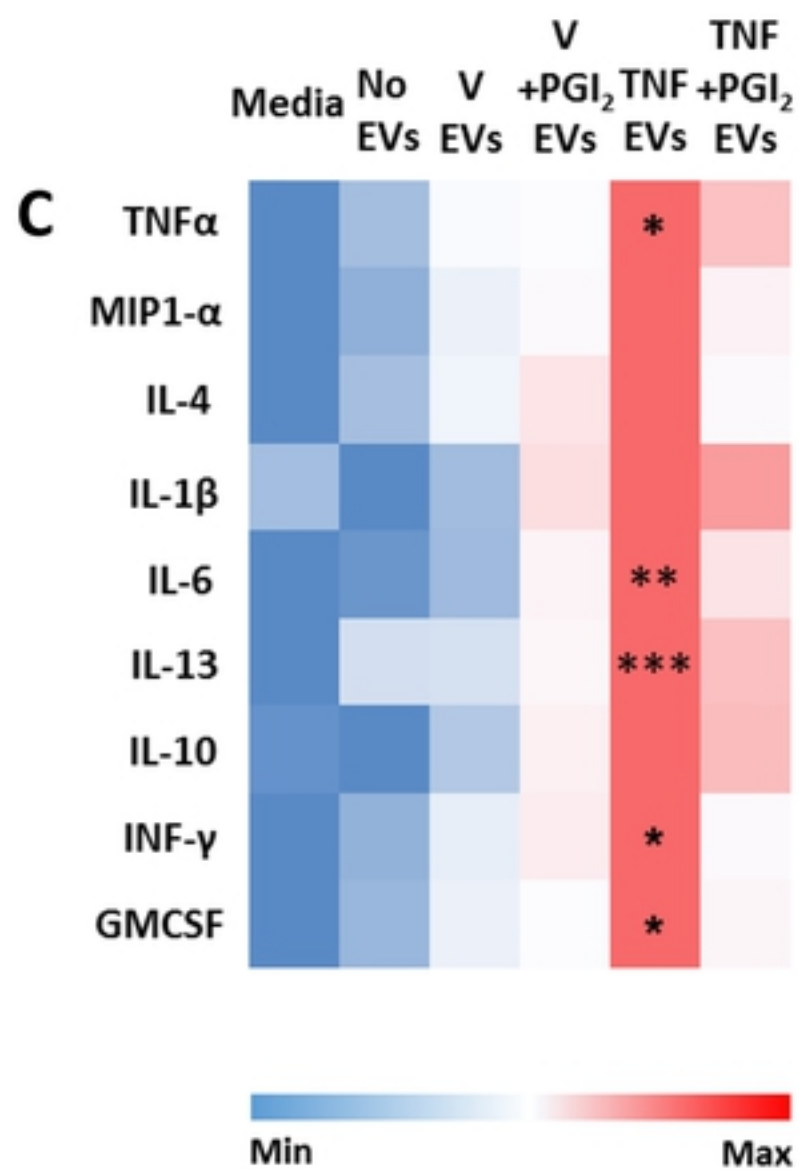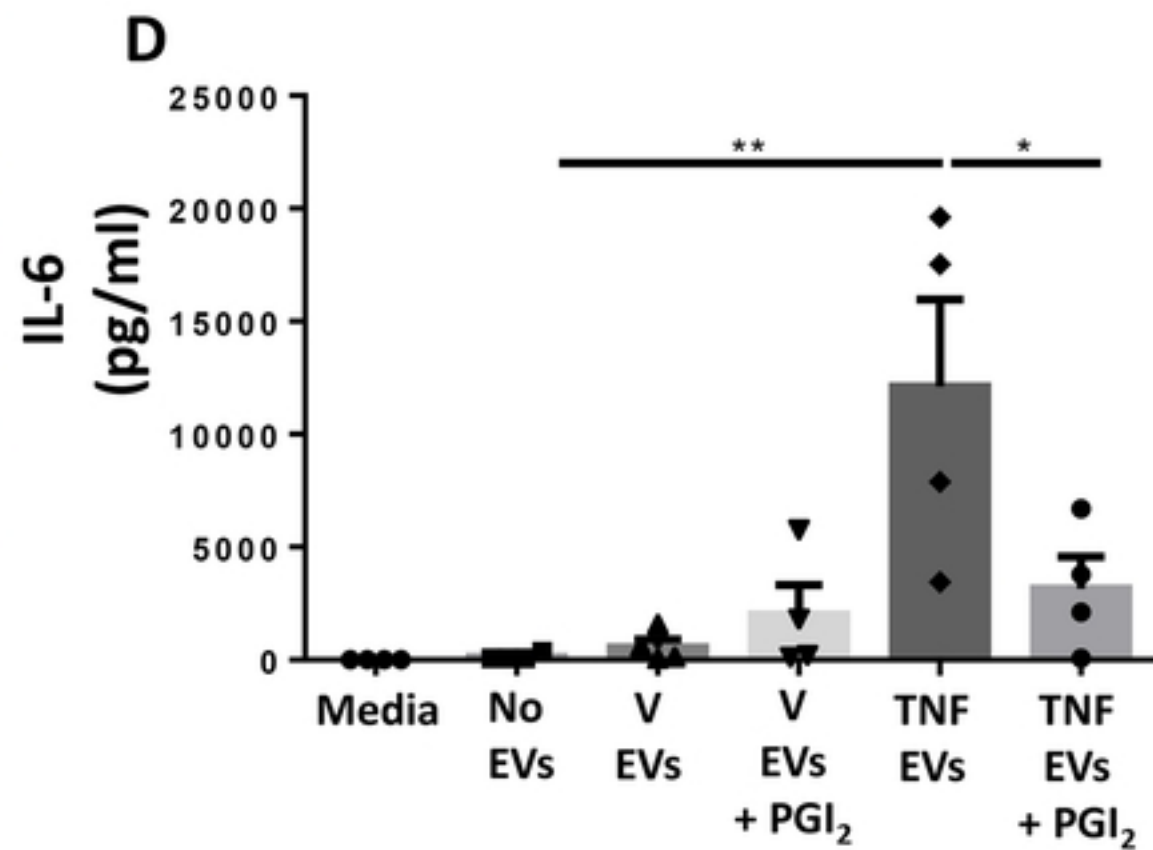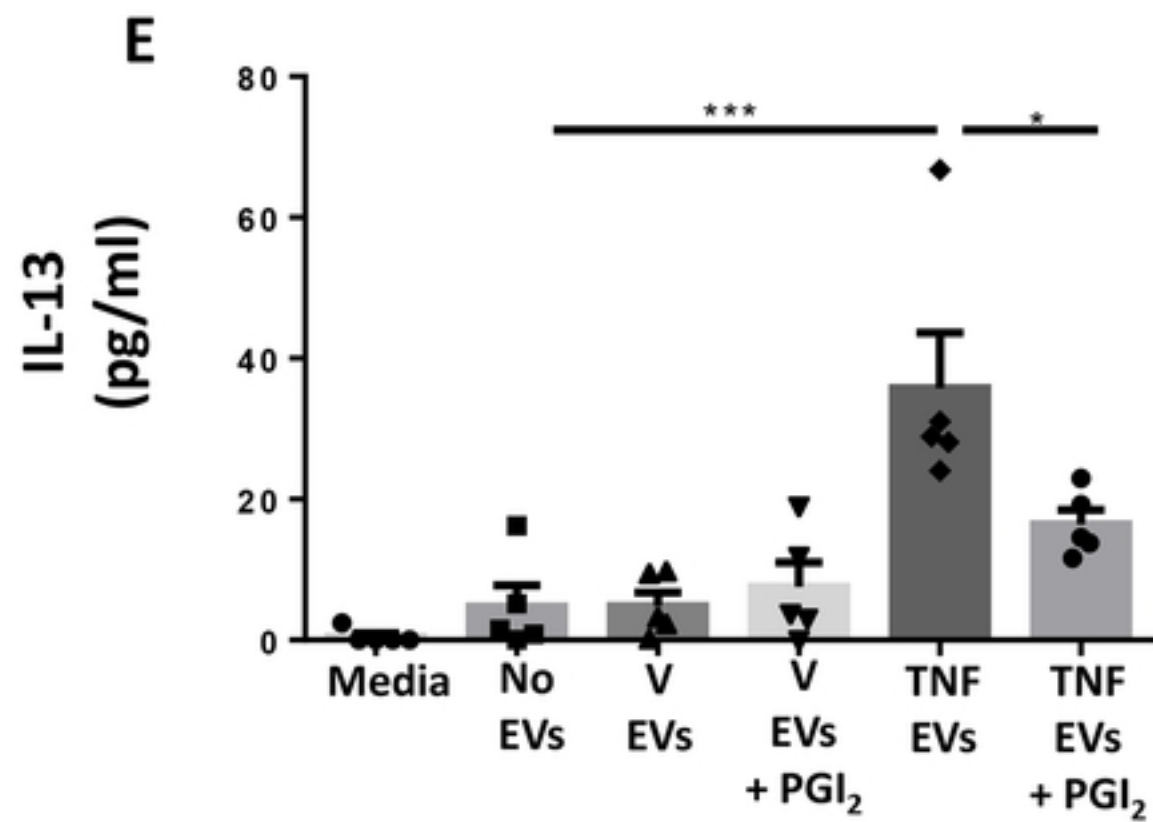

Fig4

**A**

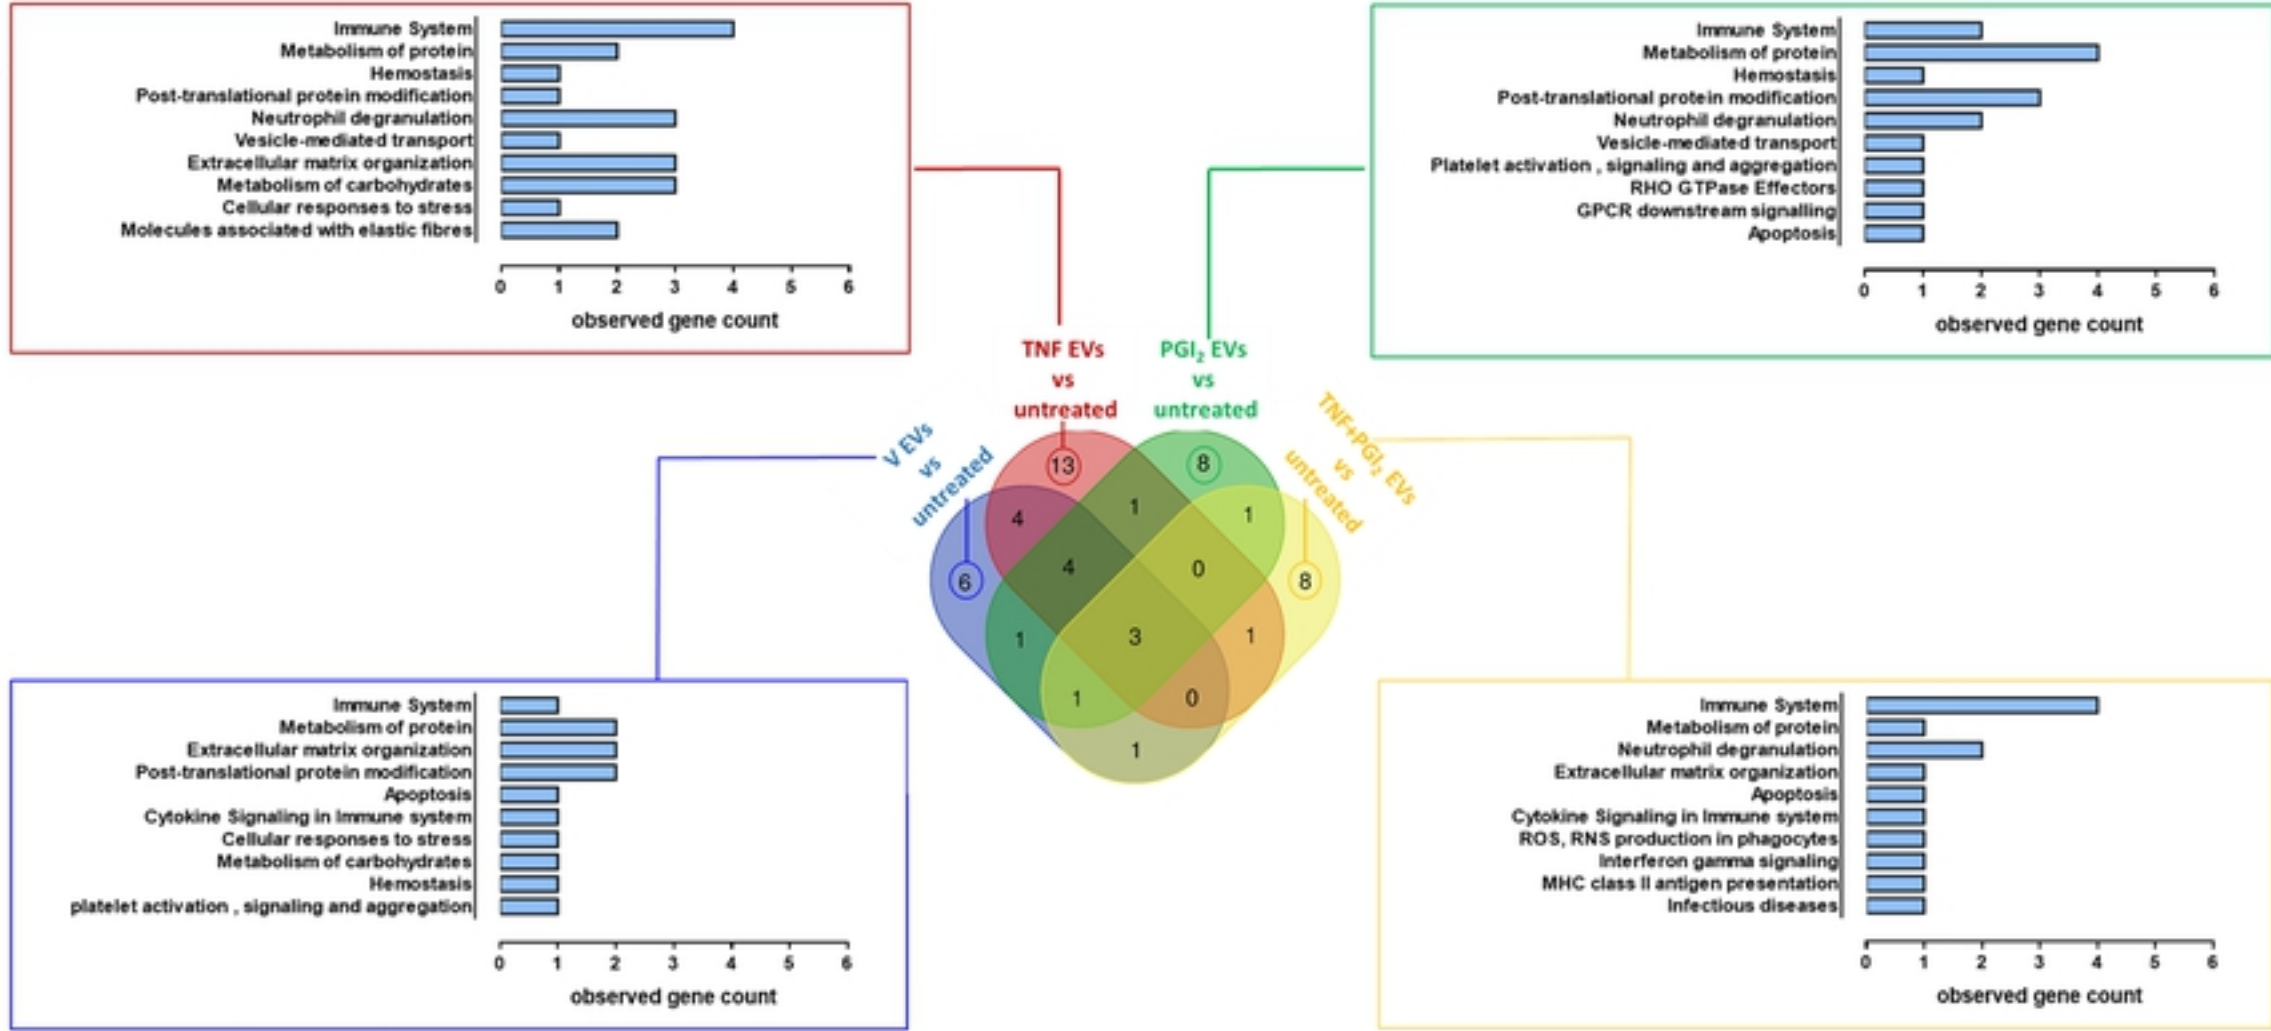

**B**

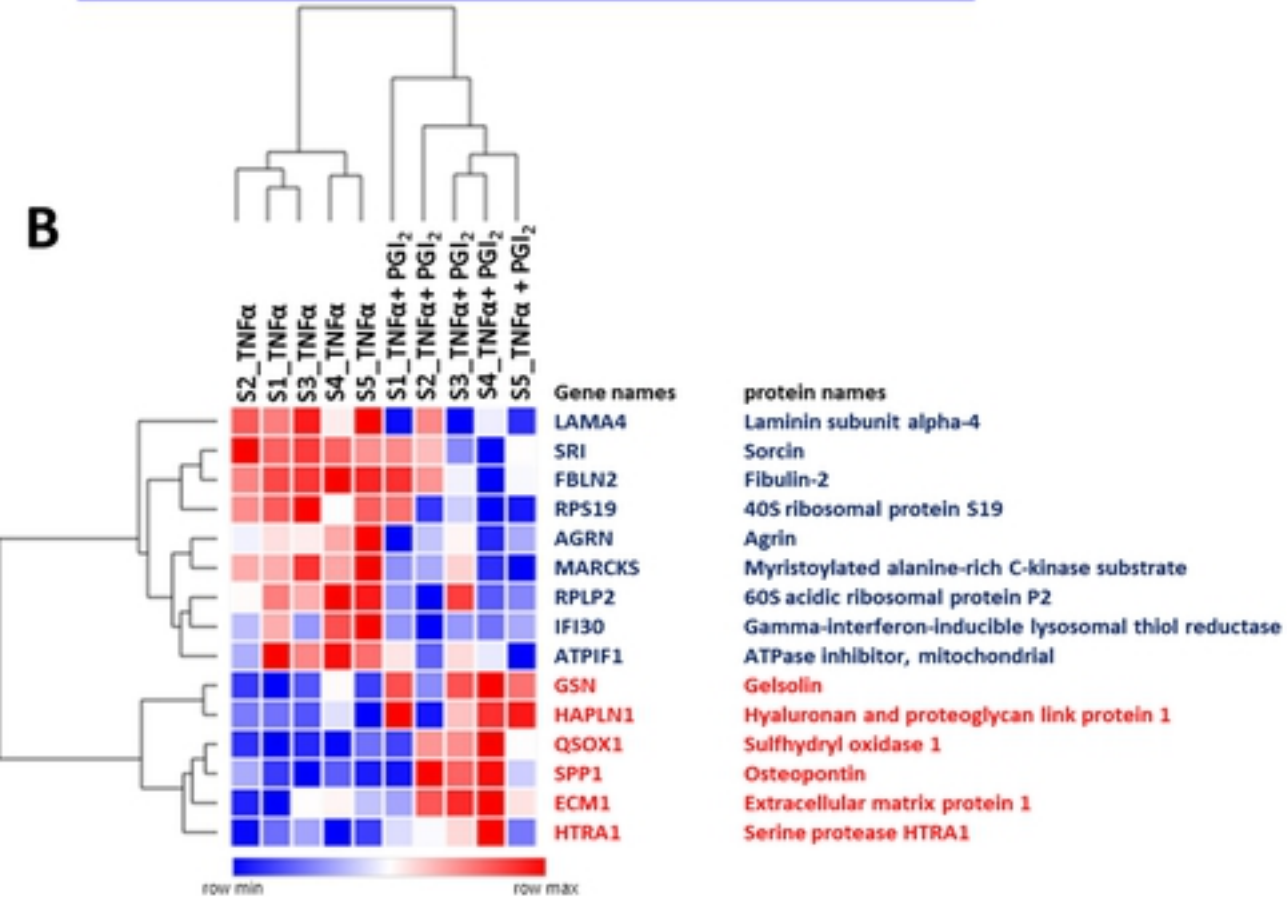

**C**

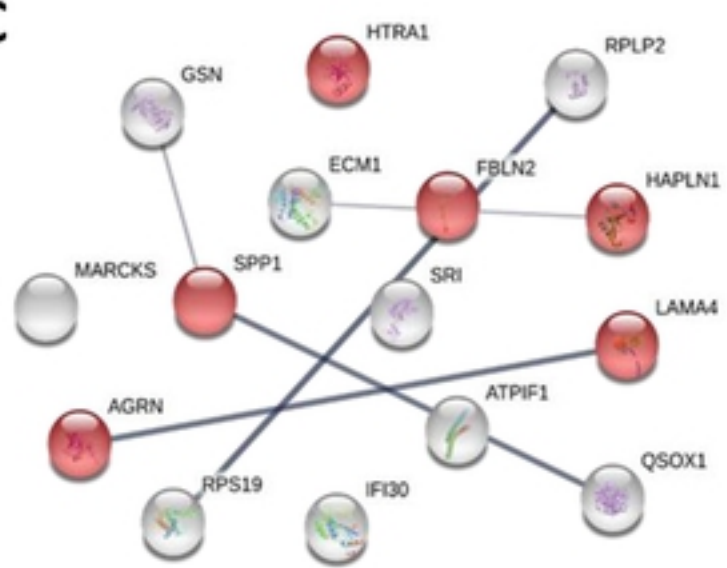

Fig5

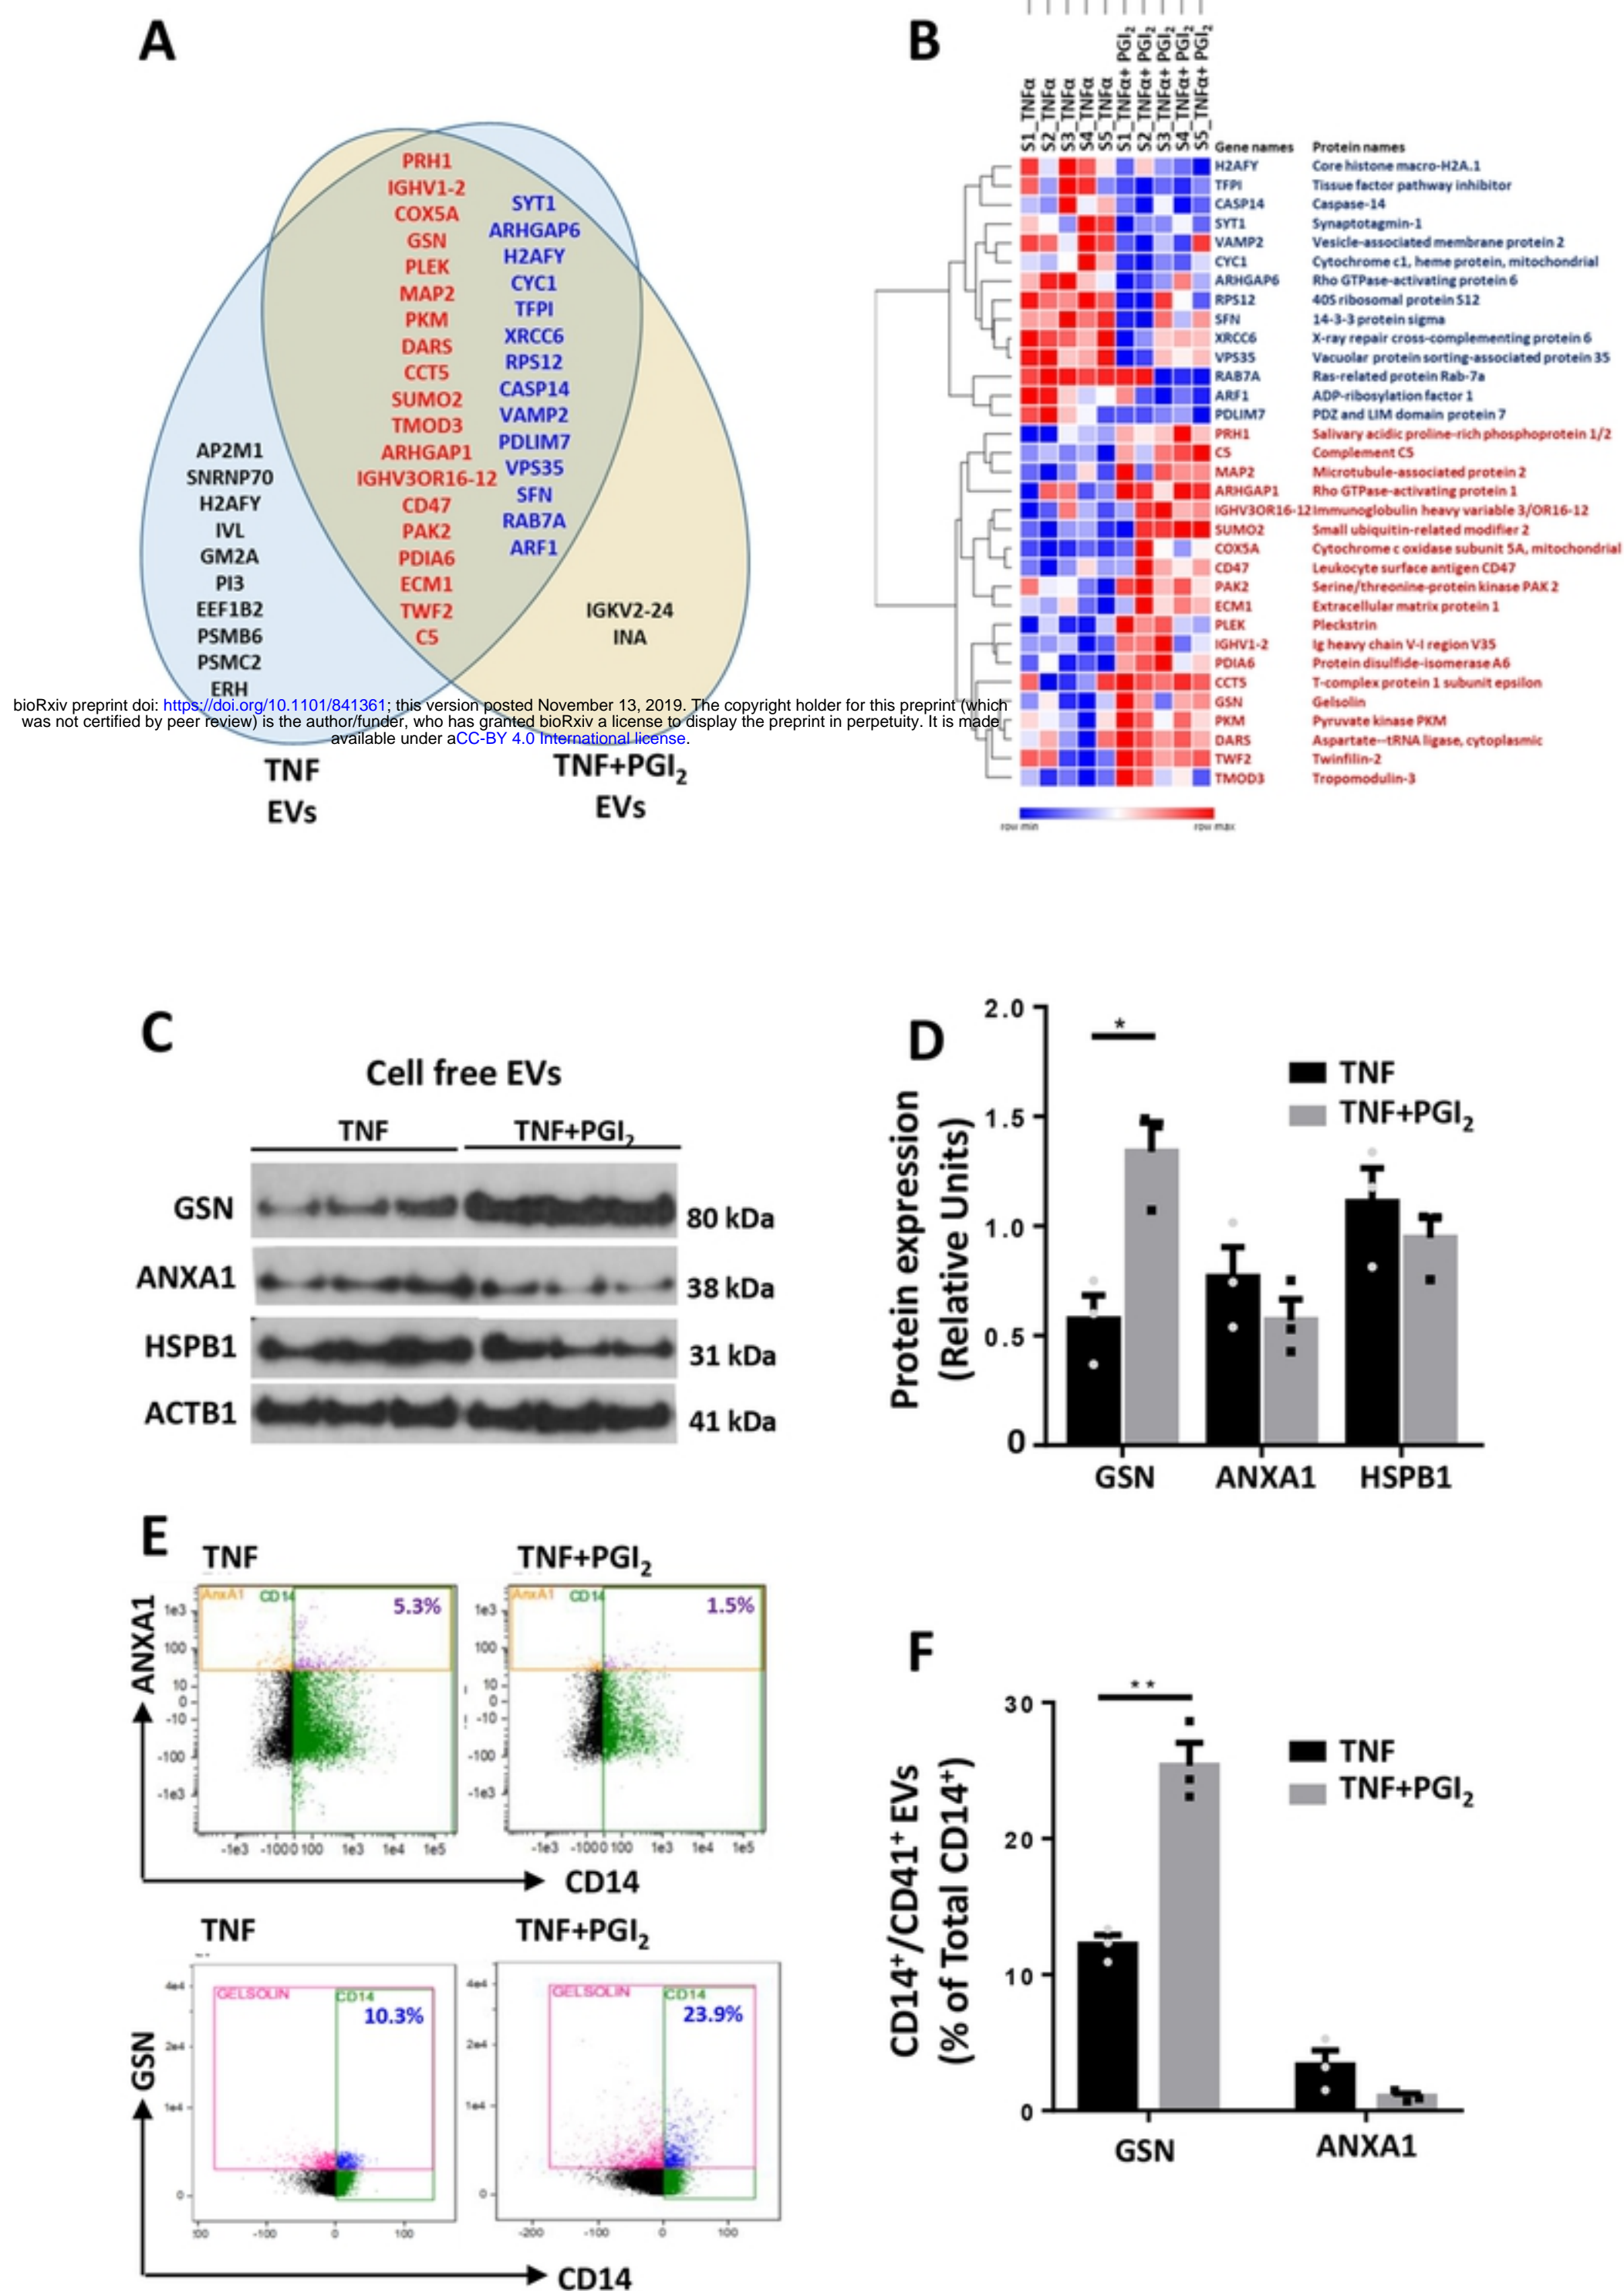

bioRxiv preprint doi: <https://doi.org/10.1101/841361>; this version posted November 13, 2019. The copyright holder for this preprint (which was not certified by peer review) is the author/funder, who has granted bioRxiv a license to display the preprint in perpetuity. It is made available under aCC-BY 4.0 International license.



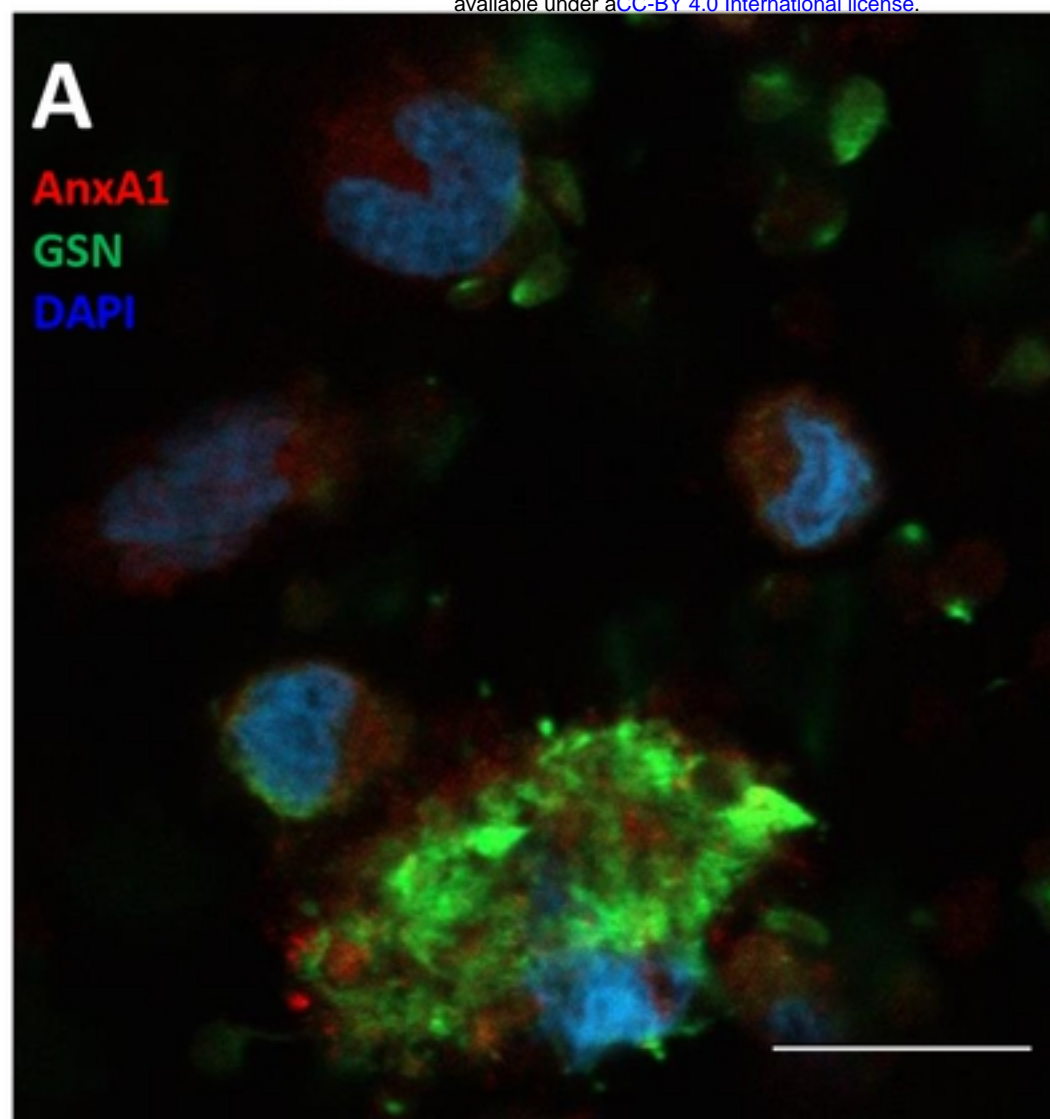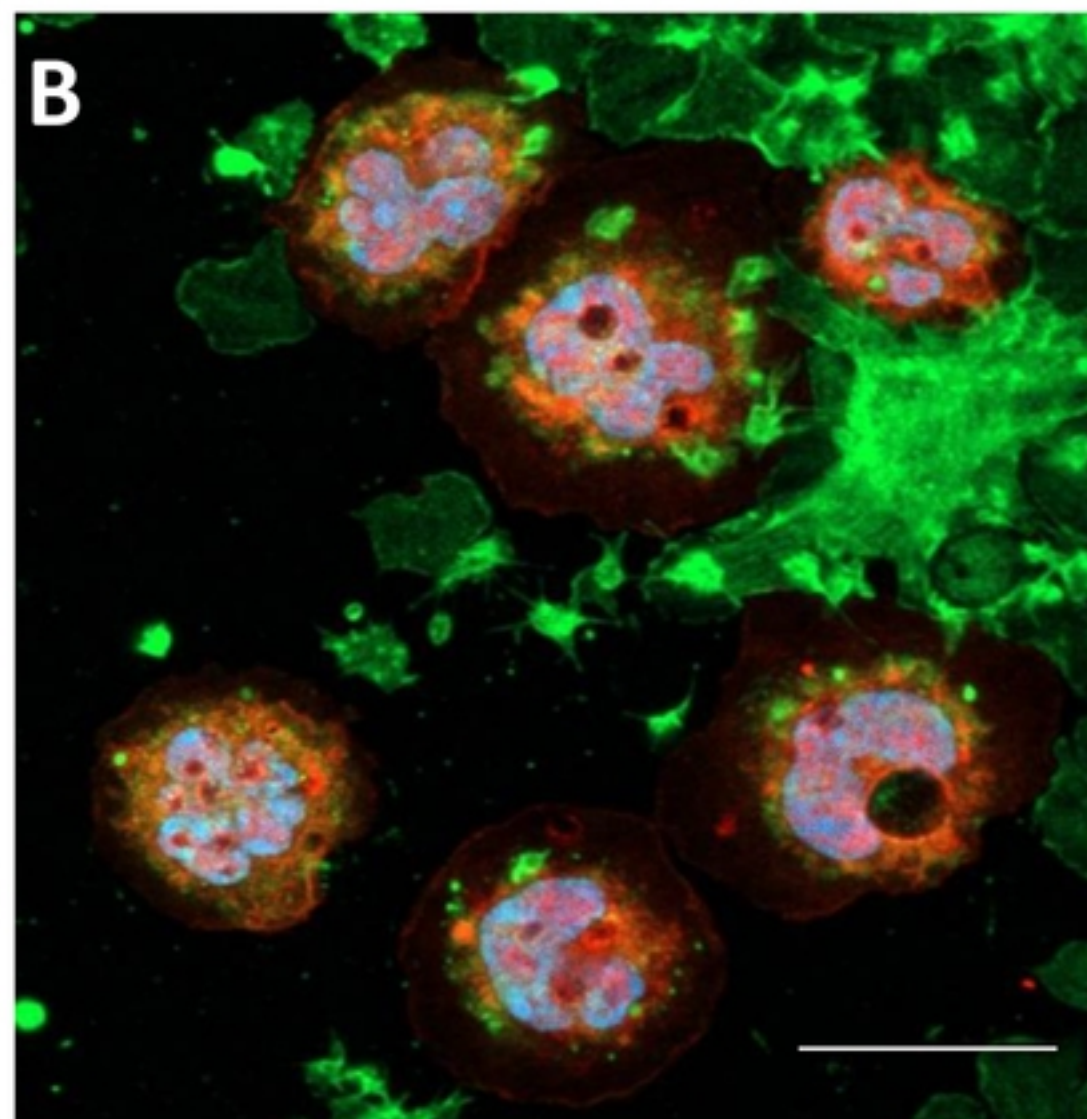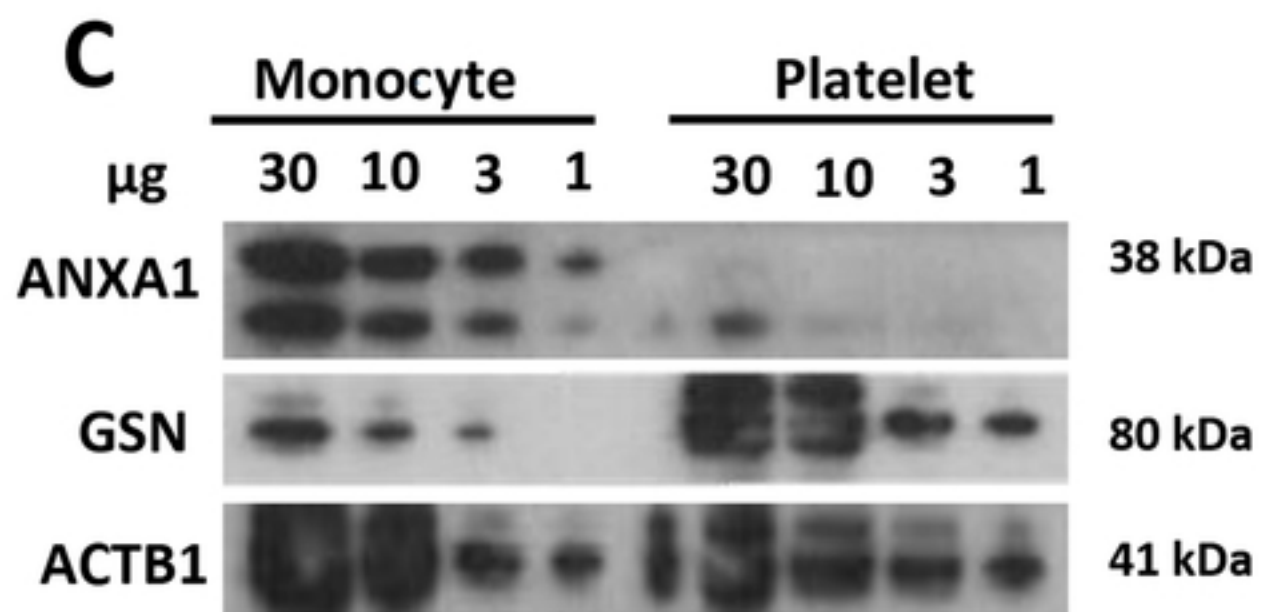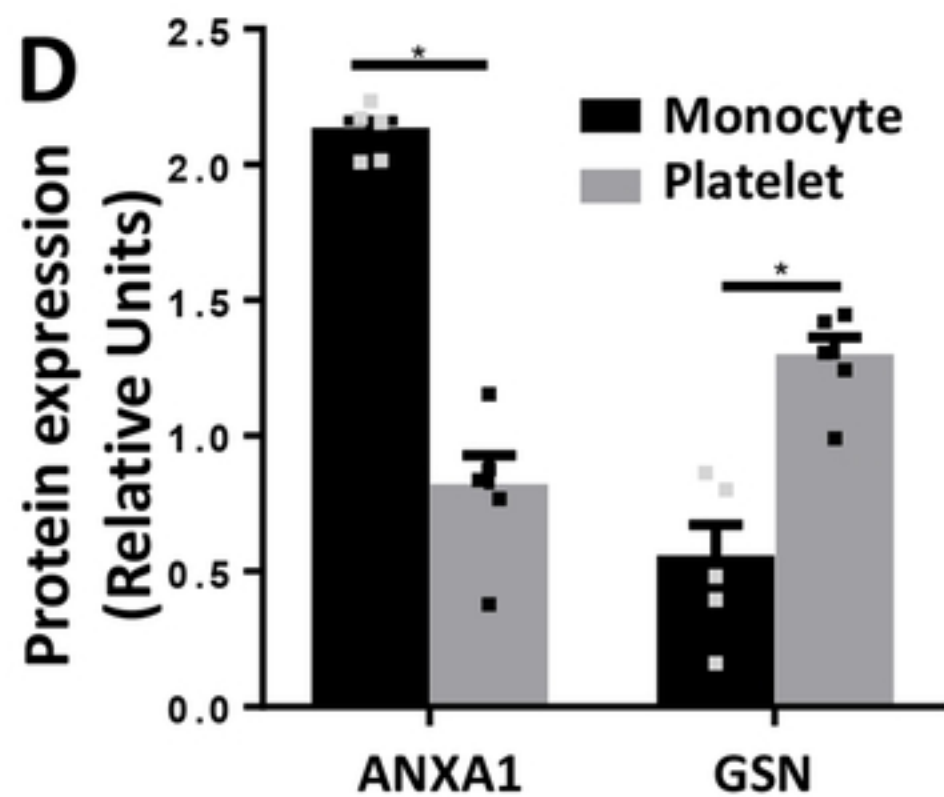

Source: https://www.biorxiv.org/content/10.1101/841361v1.full.pdf
